# Supplementary material
Source: PubMed Central journal article supplement (PMC3341826)
Supplement: supp_msr293_MSR293_Supplementary_Figures.pdf [file supp_msr293_MSR293_Supplementary_Figures.pdf]

### Supplemental Figures

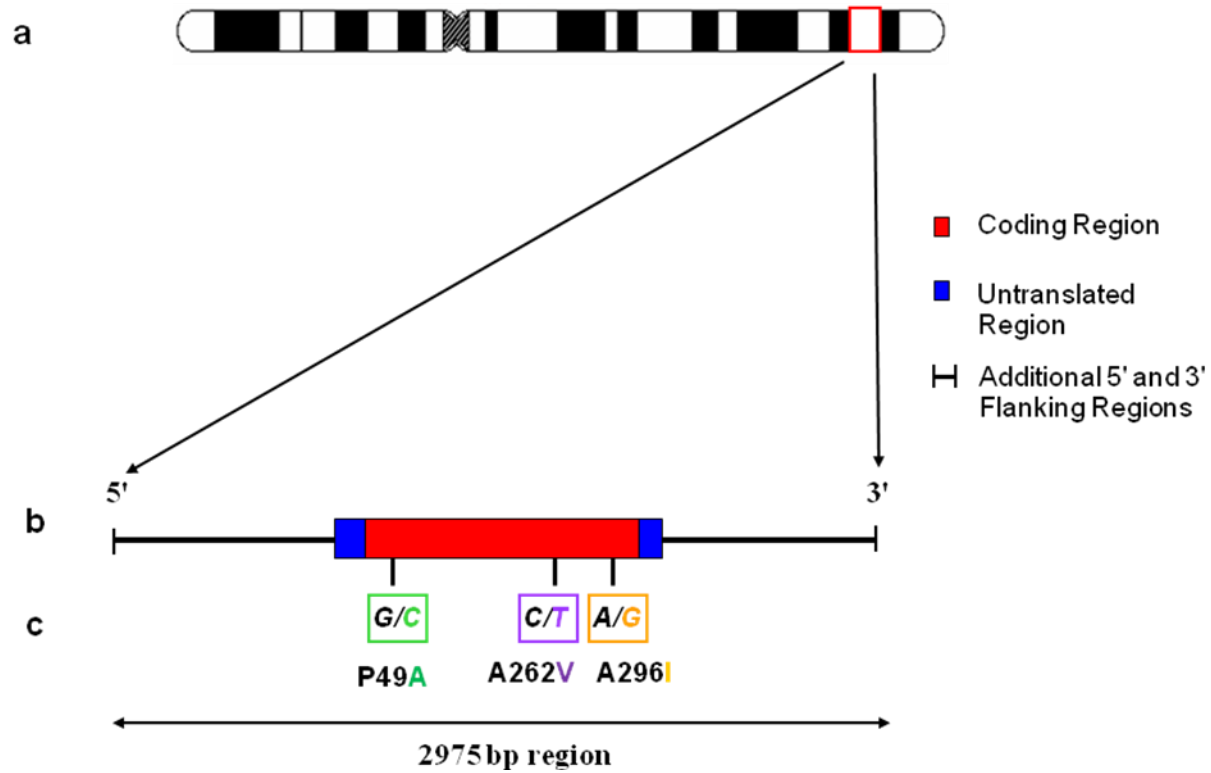

**Figure S1. *TAS2R38* gene structure and genomic location.** (a) The *TAS2R38* gene is located on the long arm of chromosome (7q34) (b) *TAS2R38* consists of a single 1,002 bp coding exon (depicted in red), and two untranslated regions (in blue) on either side of the

coding exon. The horizontal lines represent the additional non-coding regions sequenced upstream and downstream of the gene (c) the colored boxes indicate the location of common non-synonymous SNPs coding for amino acids substitutions at positions 49, 262 and 296. The horizontal arrow indicates the total 2,975 bp region sequenced.

**A**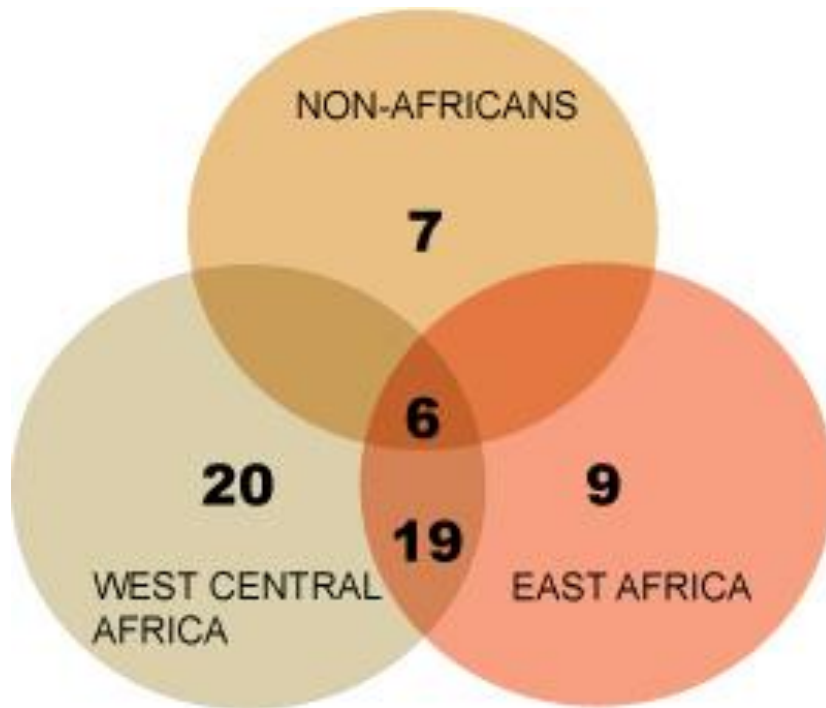**B**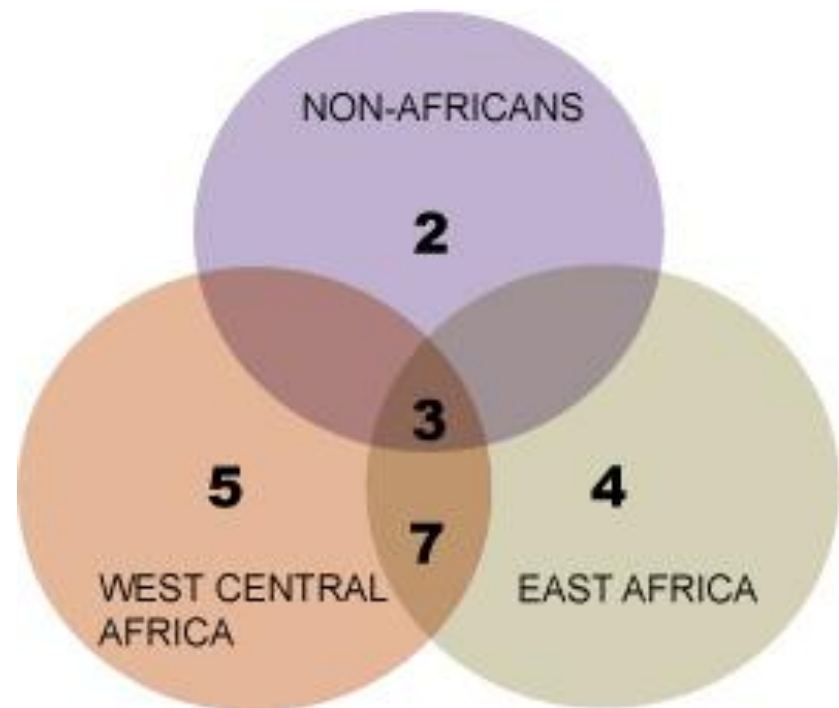

**Figure S2.** Distribution of Nucleotide Diversity (A) in 2,975 bp encompassing coding and non coding regions of *TAS2R38*, and (B) in the single coding exon of *TAS2R38*.

(A) West Central Africa

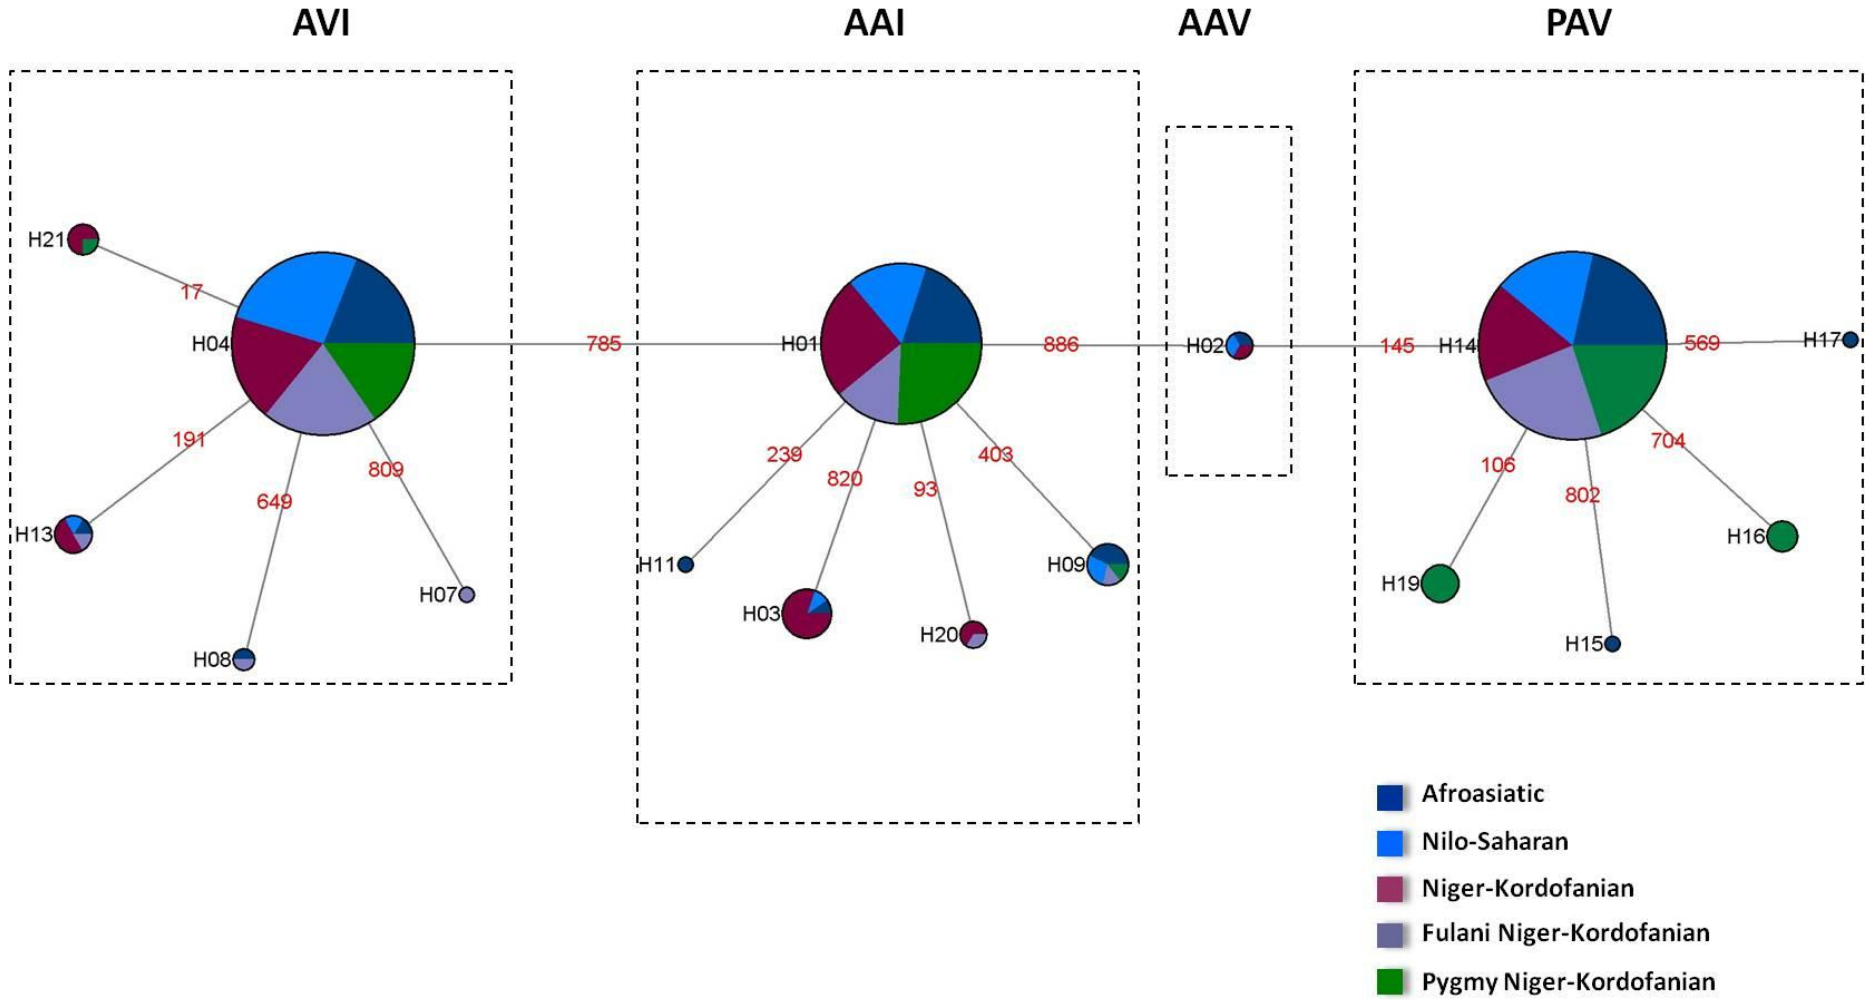

(B) East Africa

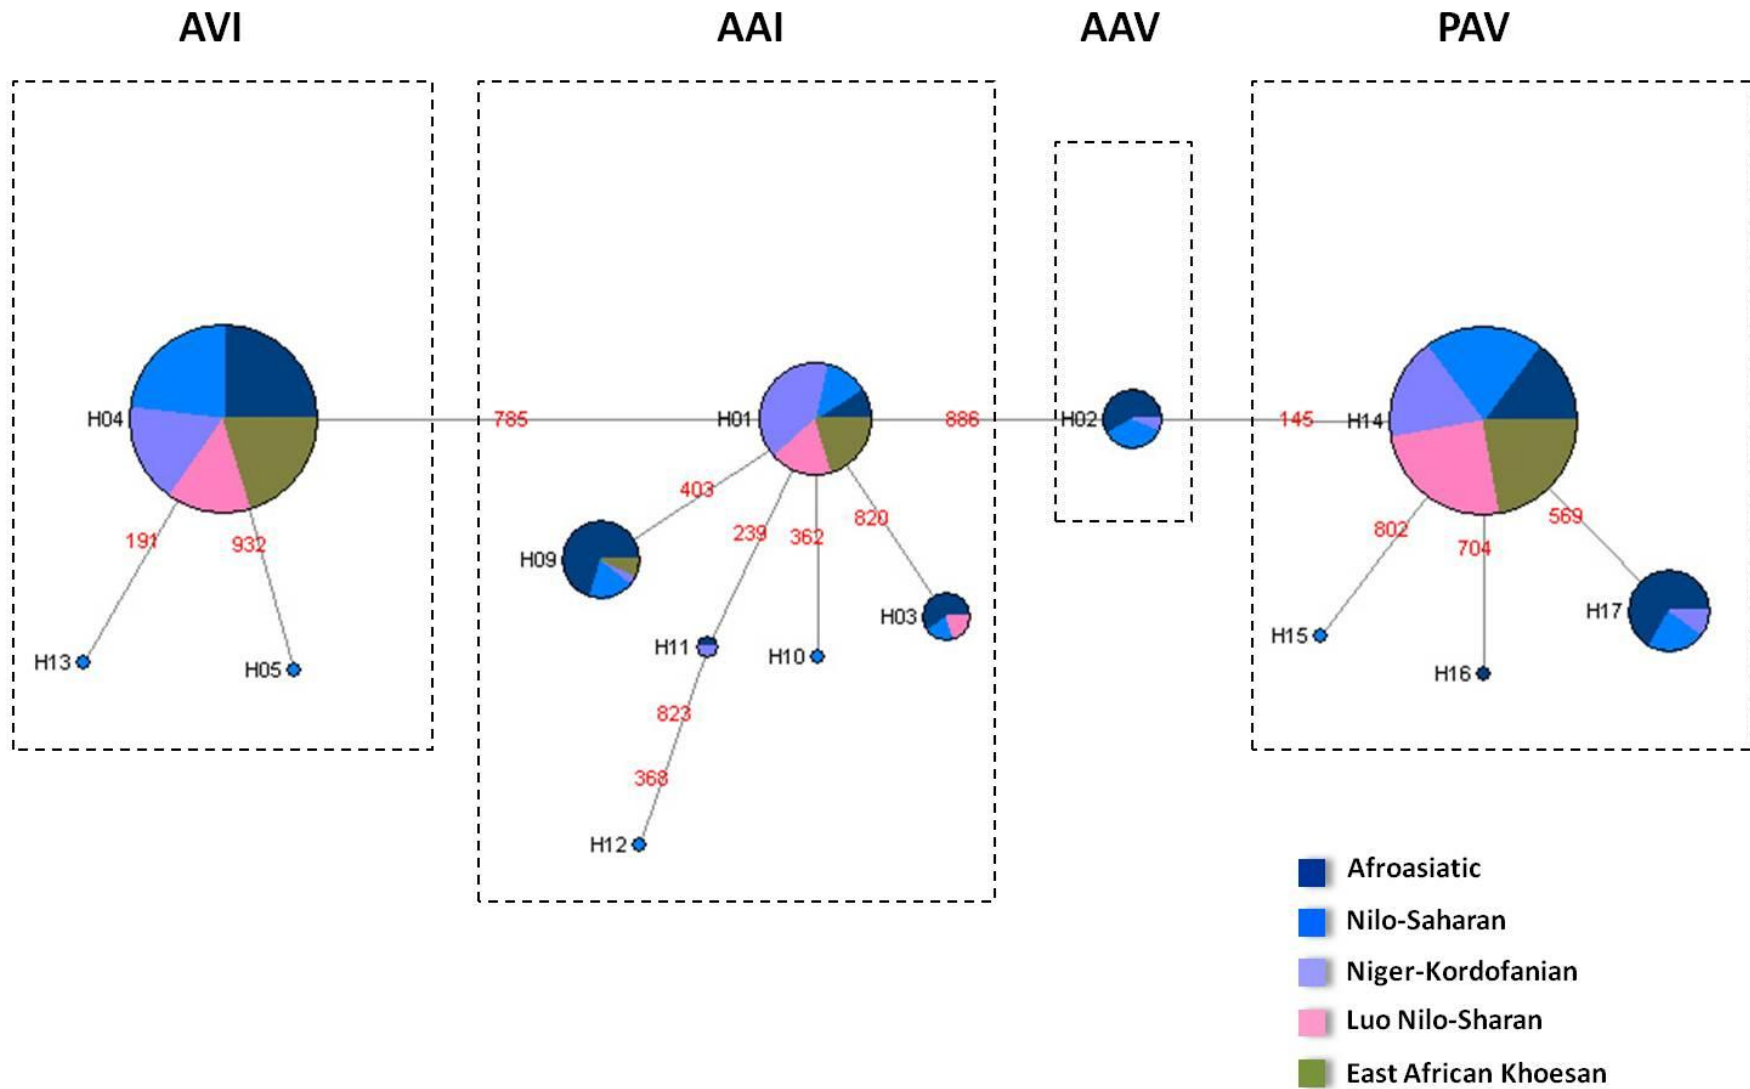

**Figure S3. Networks of inferred haplotype relationships based on African data.** Genealogical relationships of haplotypes were constructed using a maximum parsimony approach for (A) West Central Africa and (B) East Africa. Circles represent amino acid haplotypes, and the size of the circles is proportional to the number of chromosomes with a given haplotype. Colors within each haplotype represent the proportion of individuals within a population or geographic region with that given haplotype. The lines and numbers are the mutational changes between haplotypes.

(A)

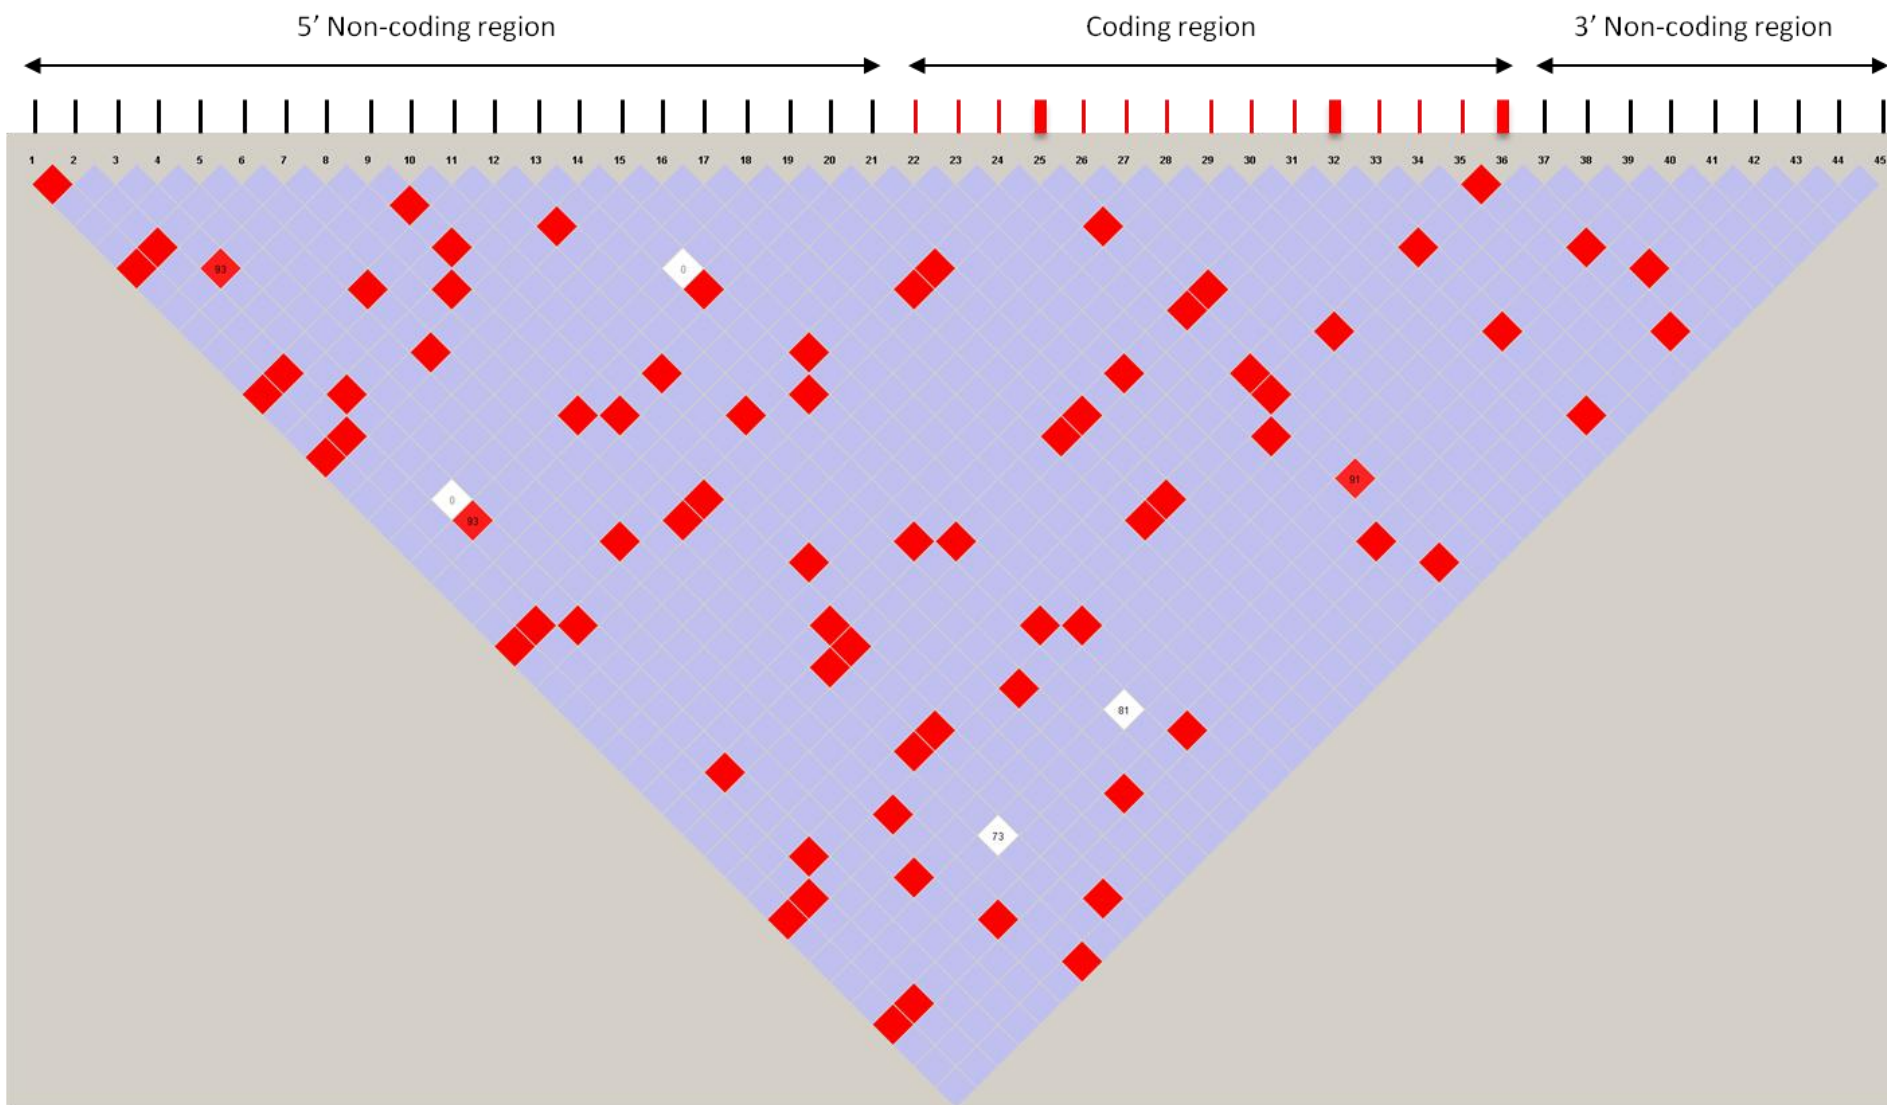

(B)

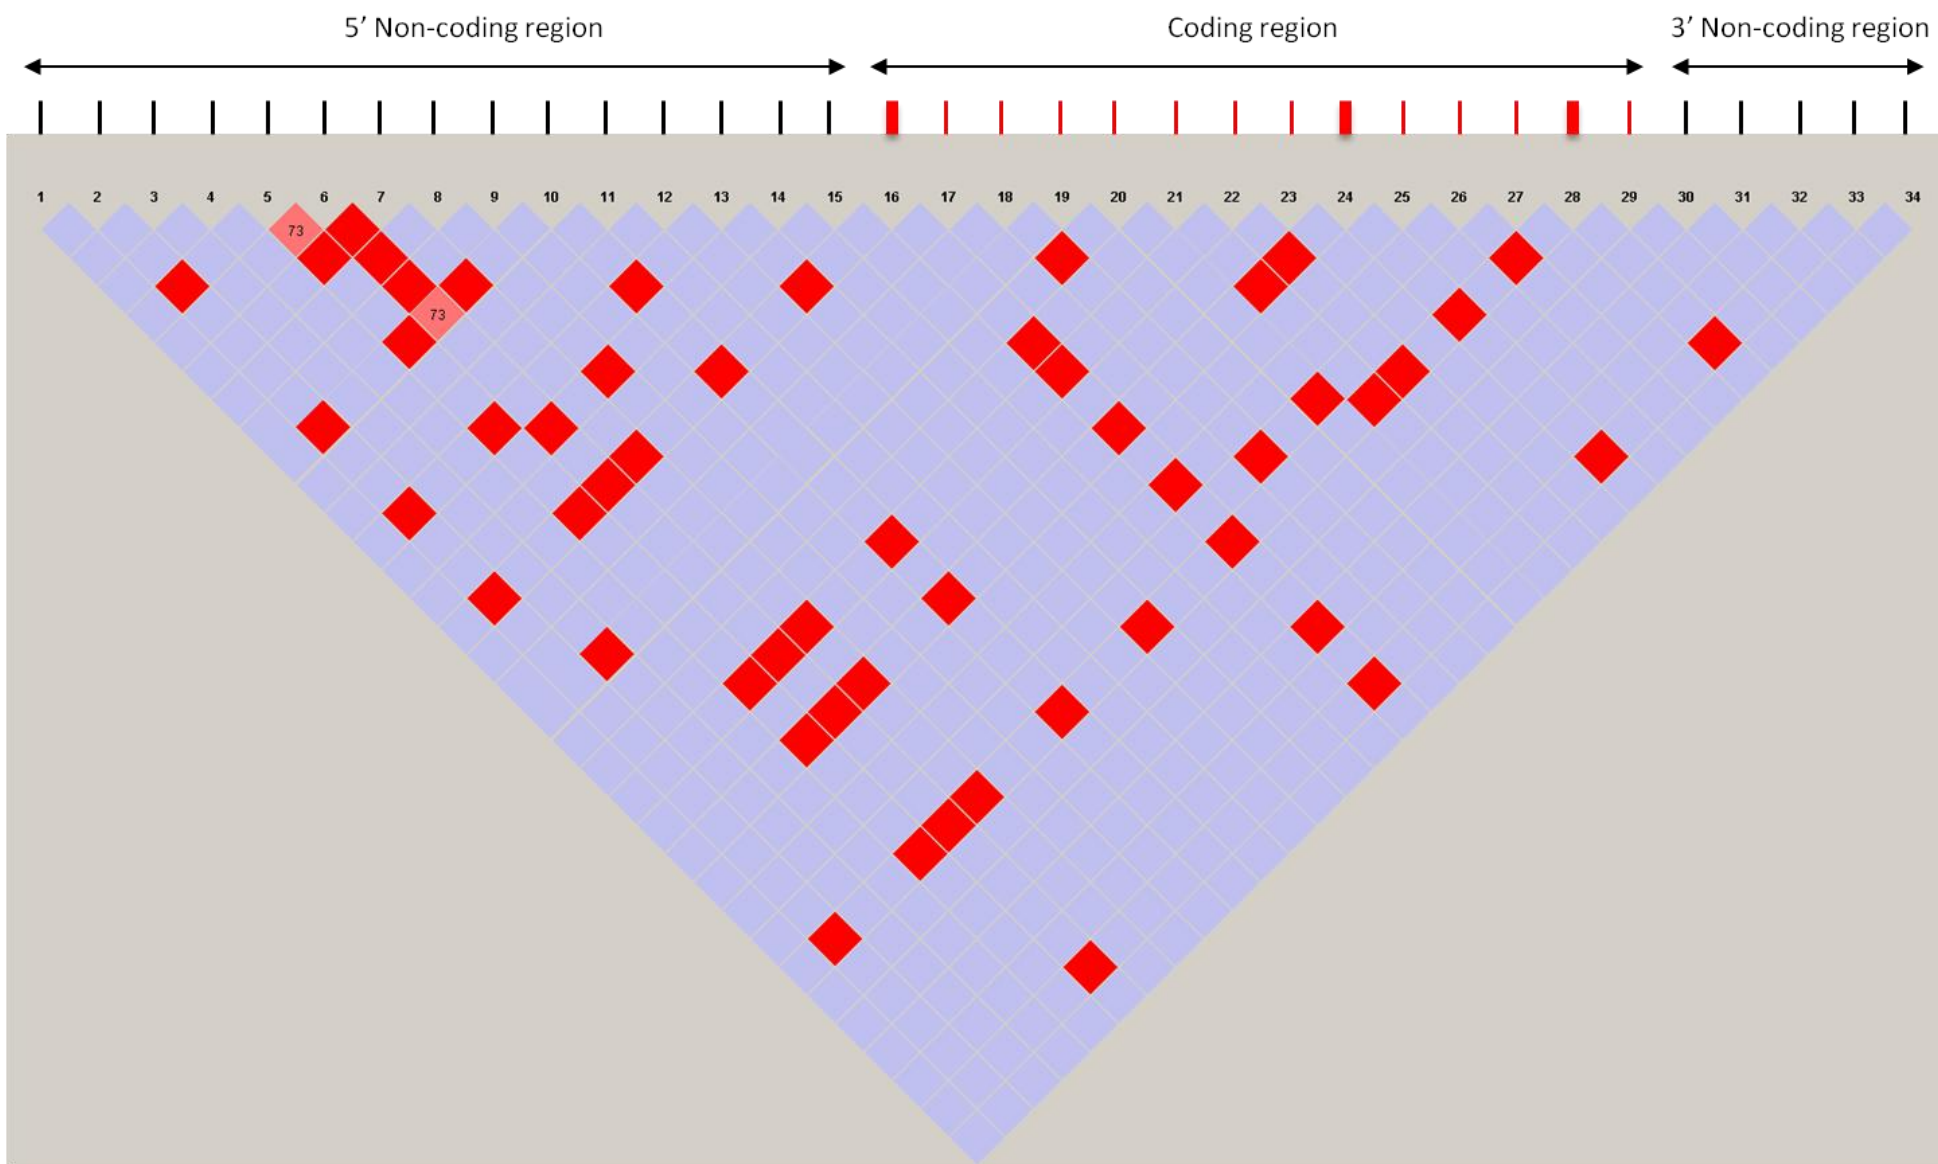



(c)

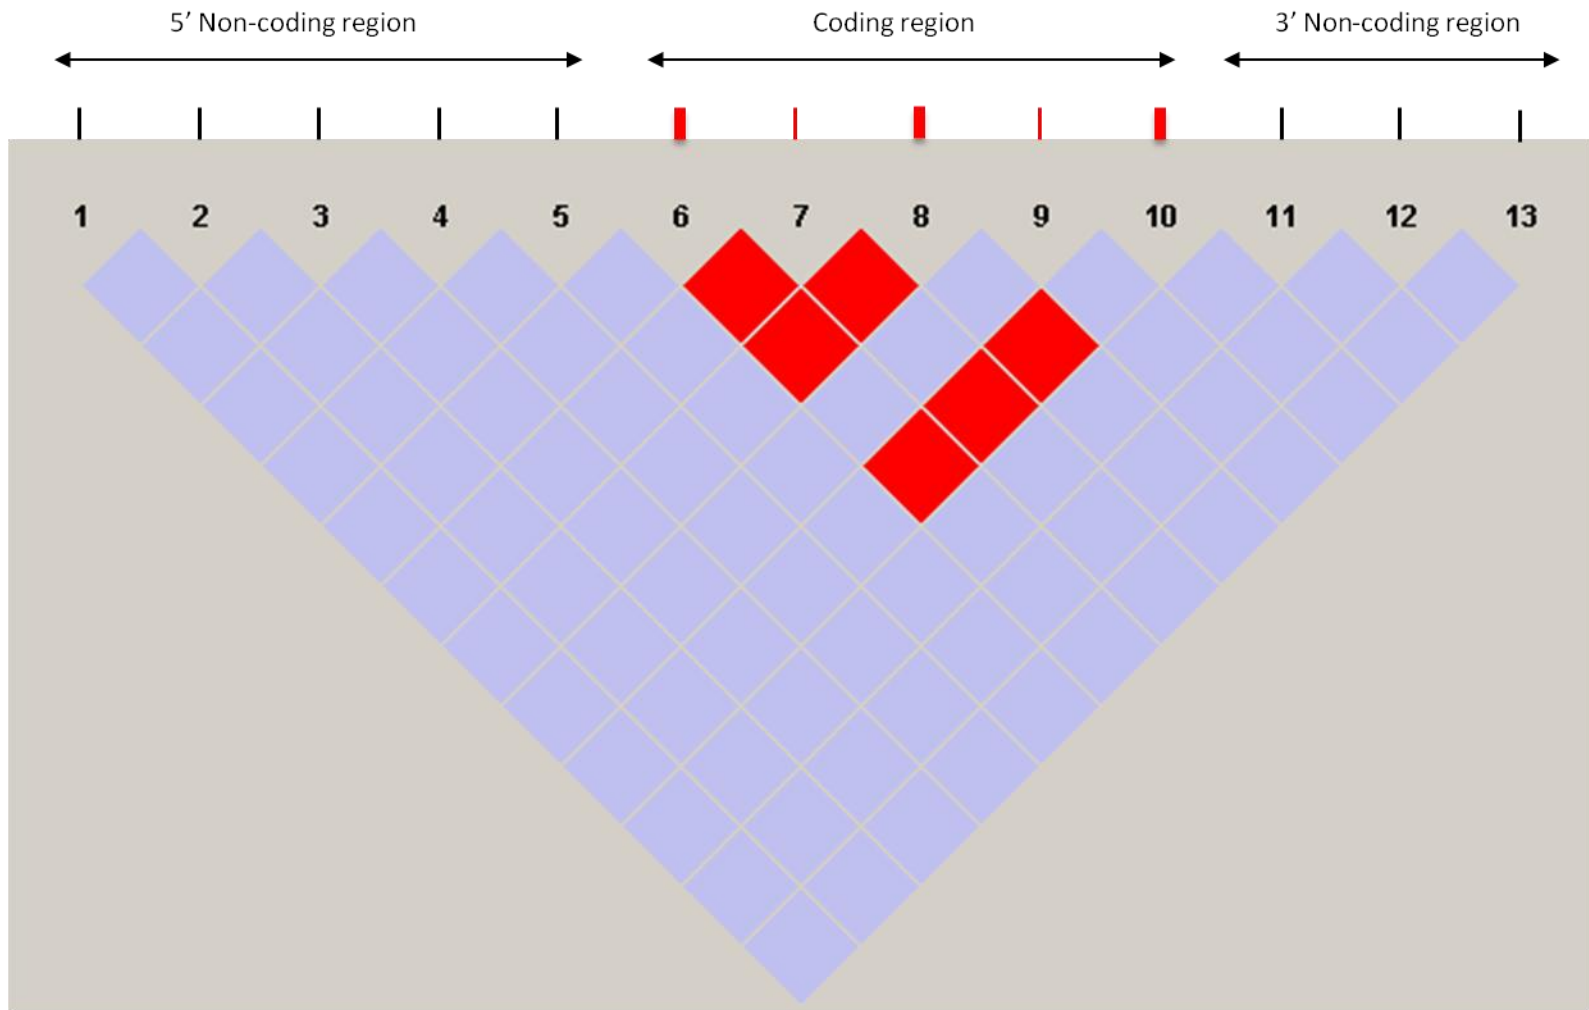

**Figure S4.** LD plots for West Central Africans, East Africans, and non-Africans. Pairwise plots of LD across the 2,975 bp region were constructed using the Haploview program (Barrett et al. 2005) for West Central African (A), East African (B) and Non-African (C) populations. The color of each square signifies the strength of the relationship between SNP alleles. For example, bright red squares indicate statistically significant LD between a given pair of SNP loci ( $D' = 1$ ;  $LOD > 2$ ), while shades of pink/white squares indicate little evidence of LD. Purple squares indicate high LD but with little statistical support (low LOD). Vertical red lines in bold in the coding region at the top of each figure represent the common variants associated with PTC bitter taste sensitivity. Because most of the variants within the 2,975 bp region occur at very low frequency ( $q < 5\%$ ), where  $q$  represents the minor allele, traditional measures of LD, such as  $D'$  or  $r^2$ , may not be sufficient to fully detect LD blocks across this genomic region (Goddard et al. 2000).

(A)

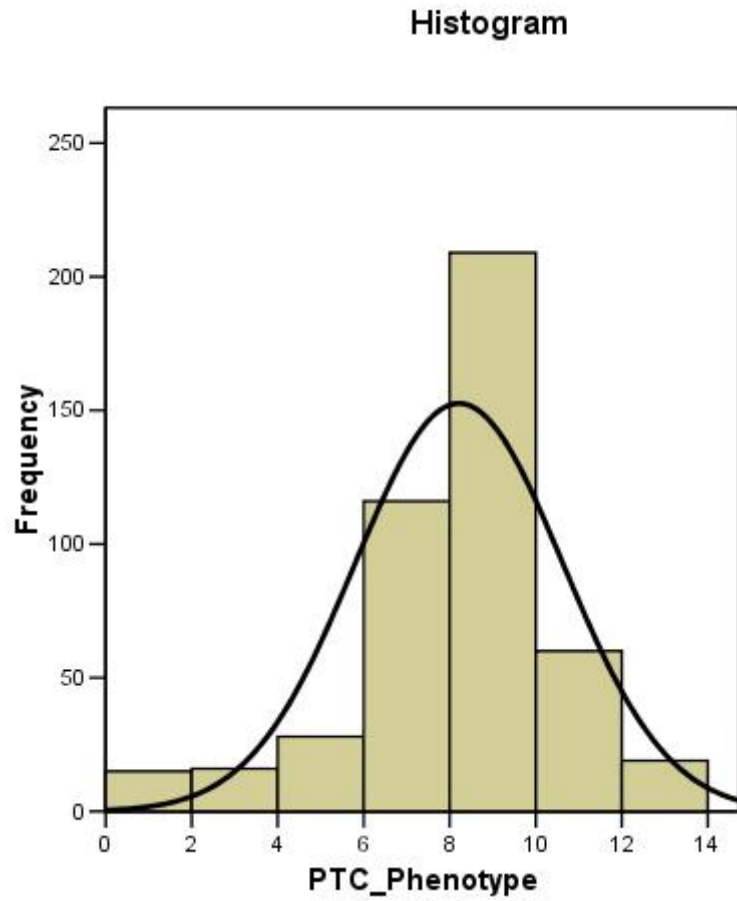

(B)

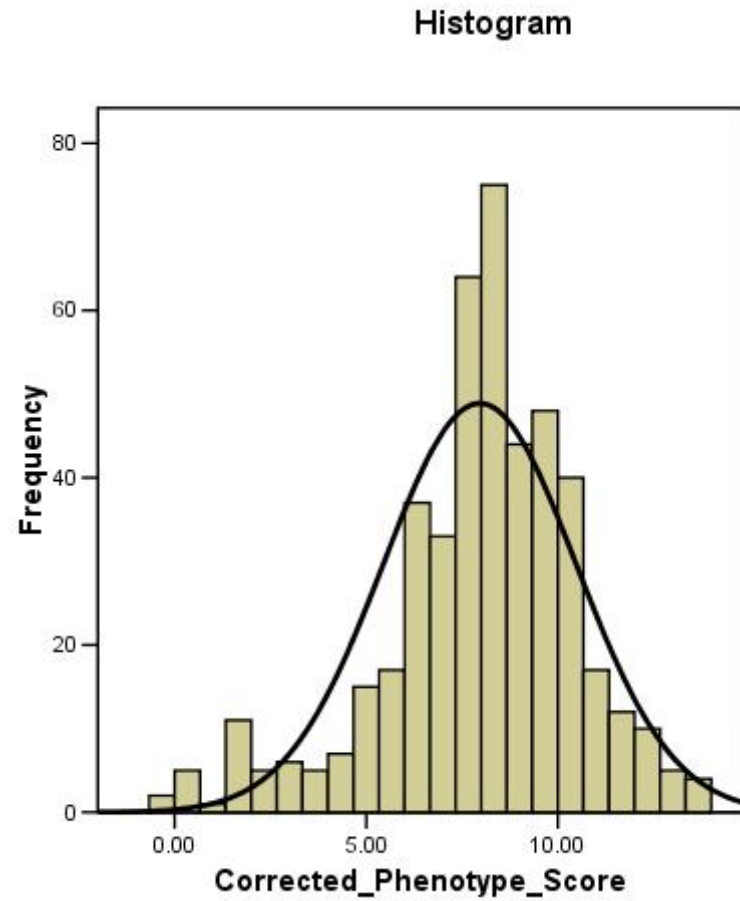

**Figure S5.** Distribution of PTC scores in 463 African individuals (A) raw PTC scores (B) PTC scores adjusted for age and sex. The solid line represents a normal curve drawn over the observed distribution of PTC score in Africans.

## WEST CENTRAL AFRICA

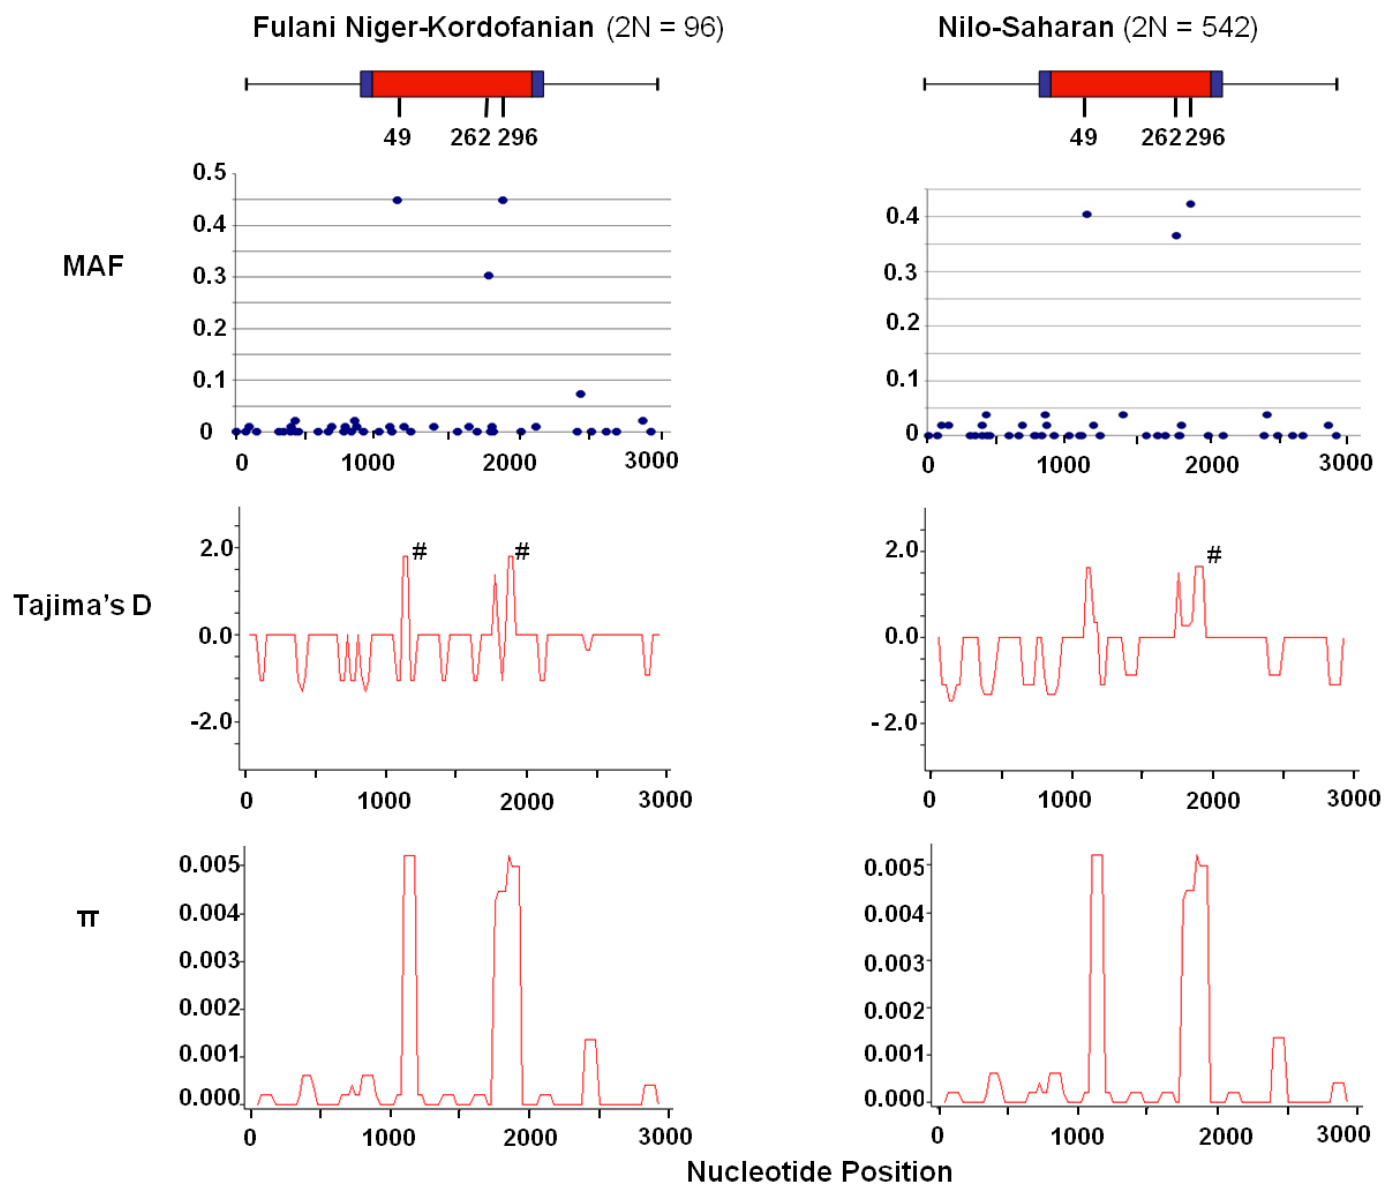

# WEST CENTRAL AFRICA

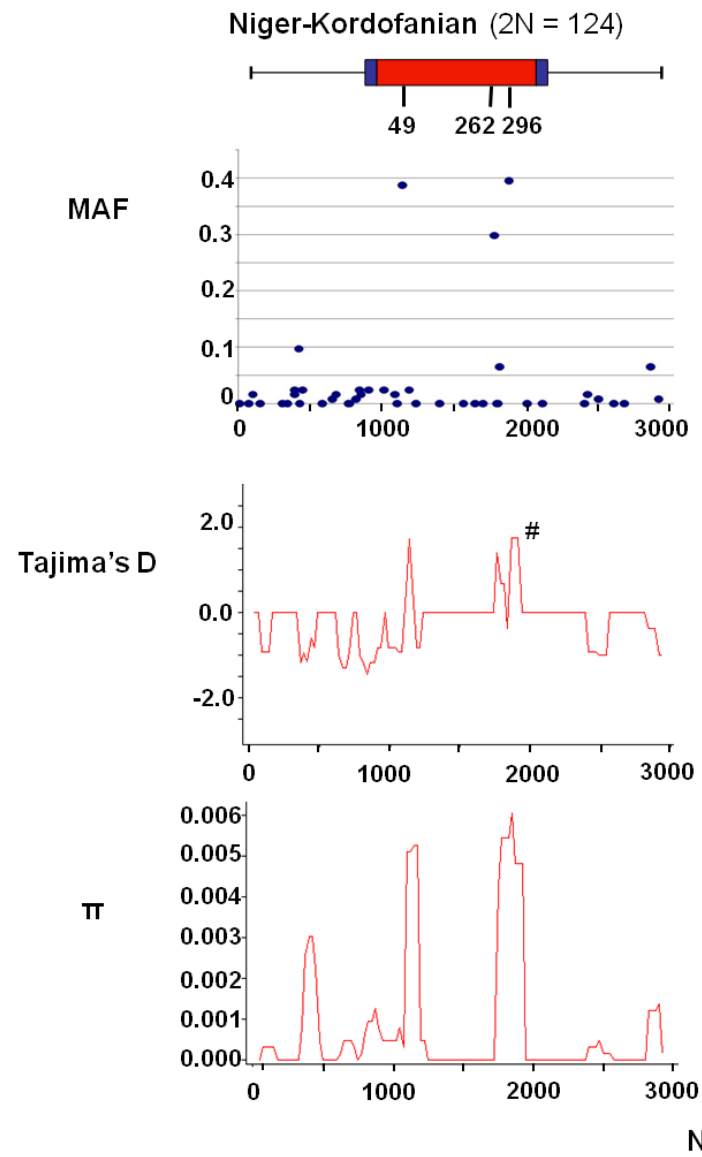

# EAST AFRICA

Afro-Asiatic (2N = 264)

Nilo-Saharan (n = 260)

MAF

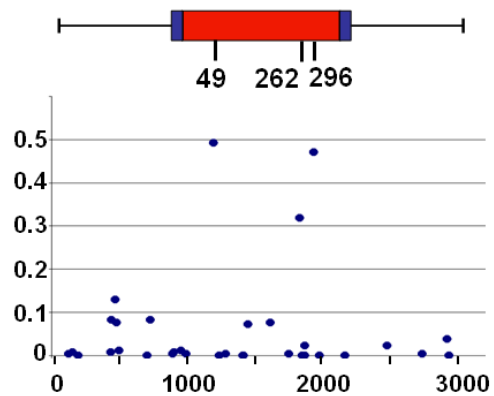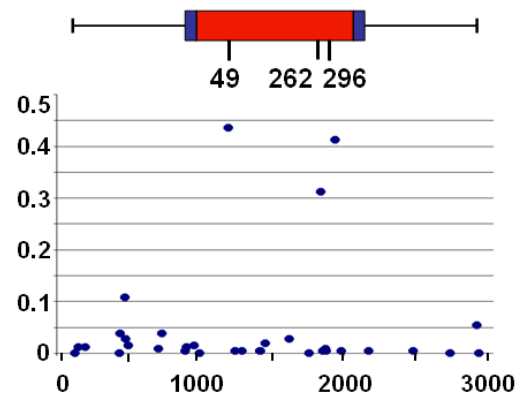

Tajima's D

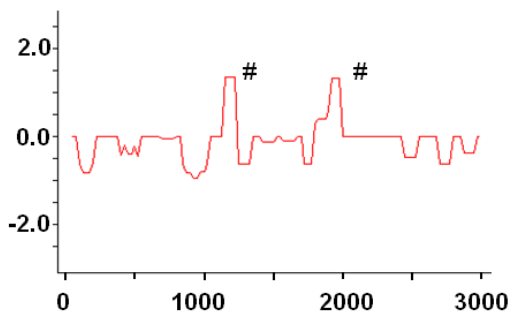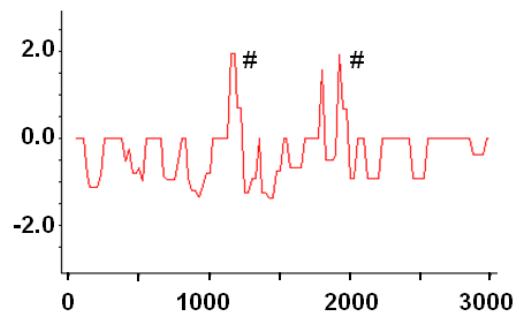

$\pi$

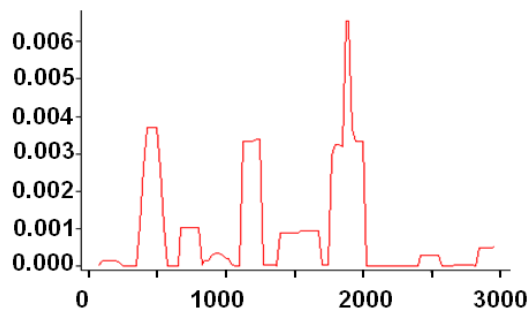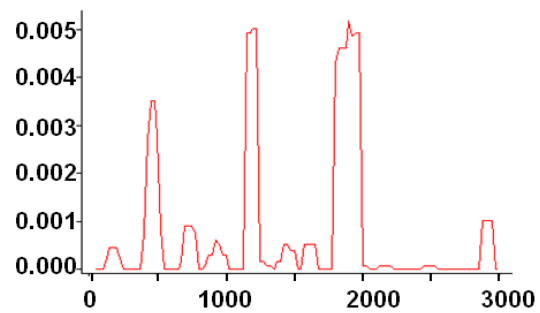

Nucleotide Position

# EAST AFRICA

Niger-Kordofanian (2N = 68)

Luo Nilo-Saharan (2N = 42)

MAF

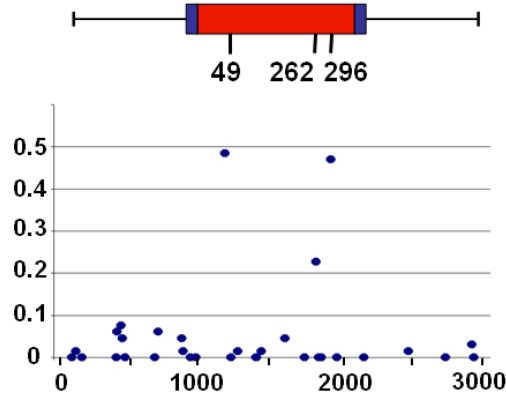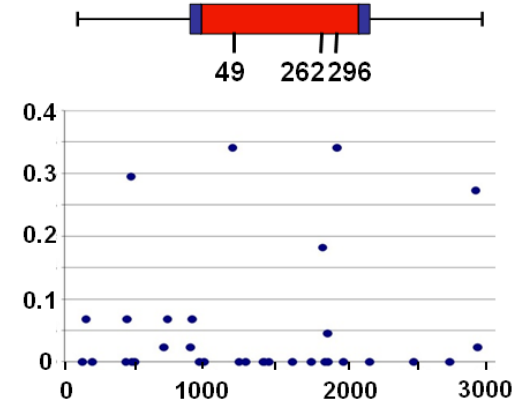

Tajima's D

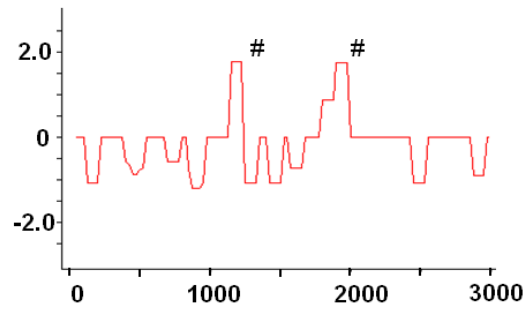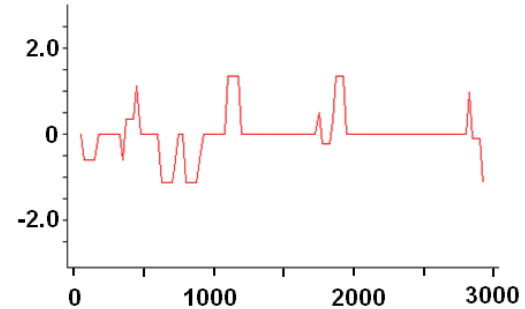

$\pi$

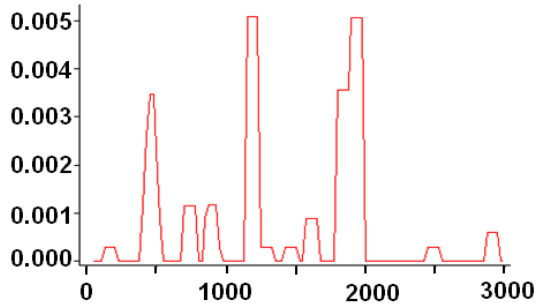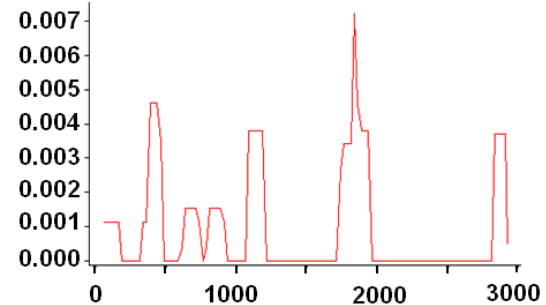

Nucleotide Position

# EAST AFRICA

Hadza and Sandawe (2N = 46)

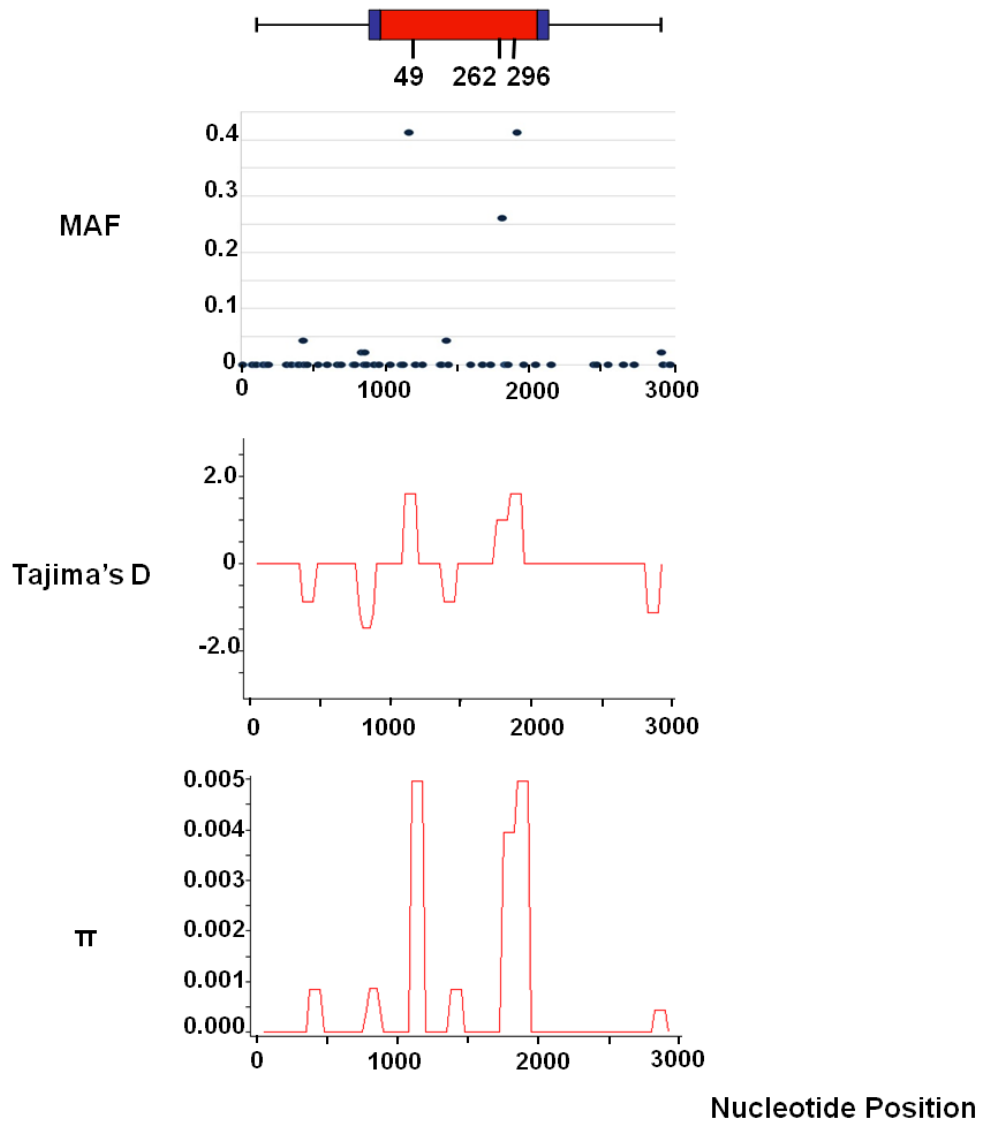



## POOLED POPULATIONS

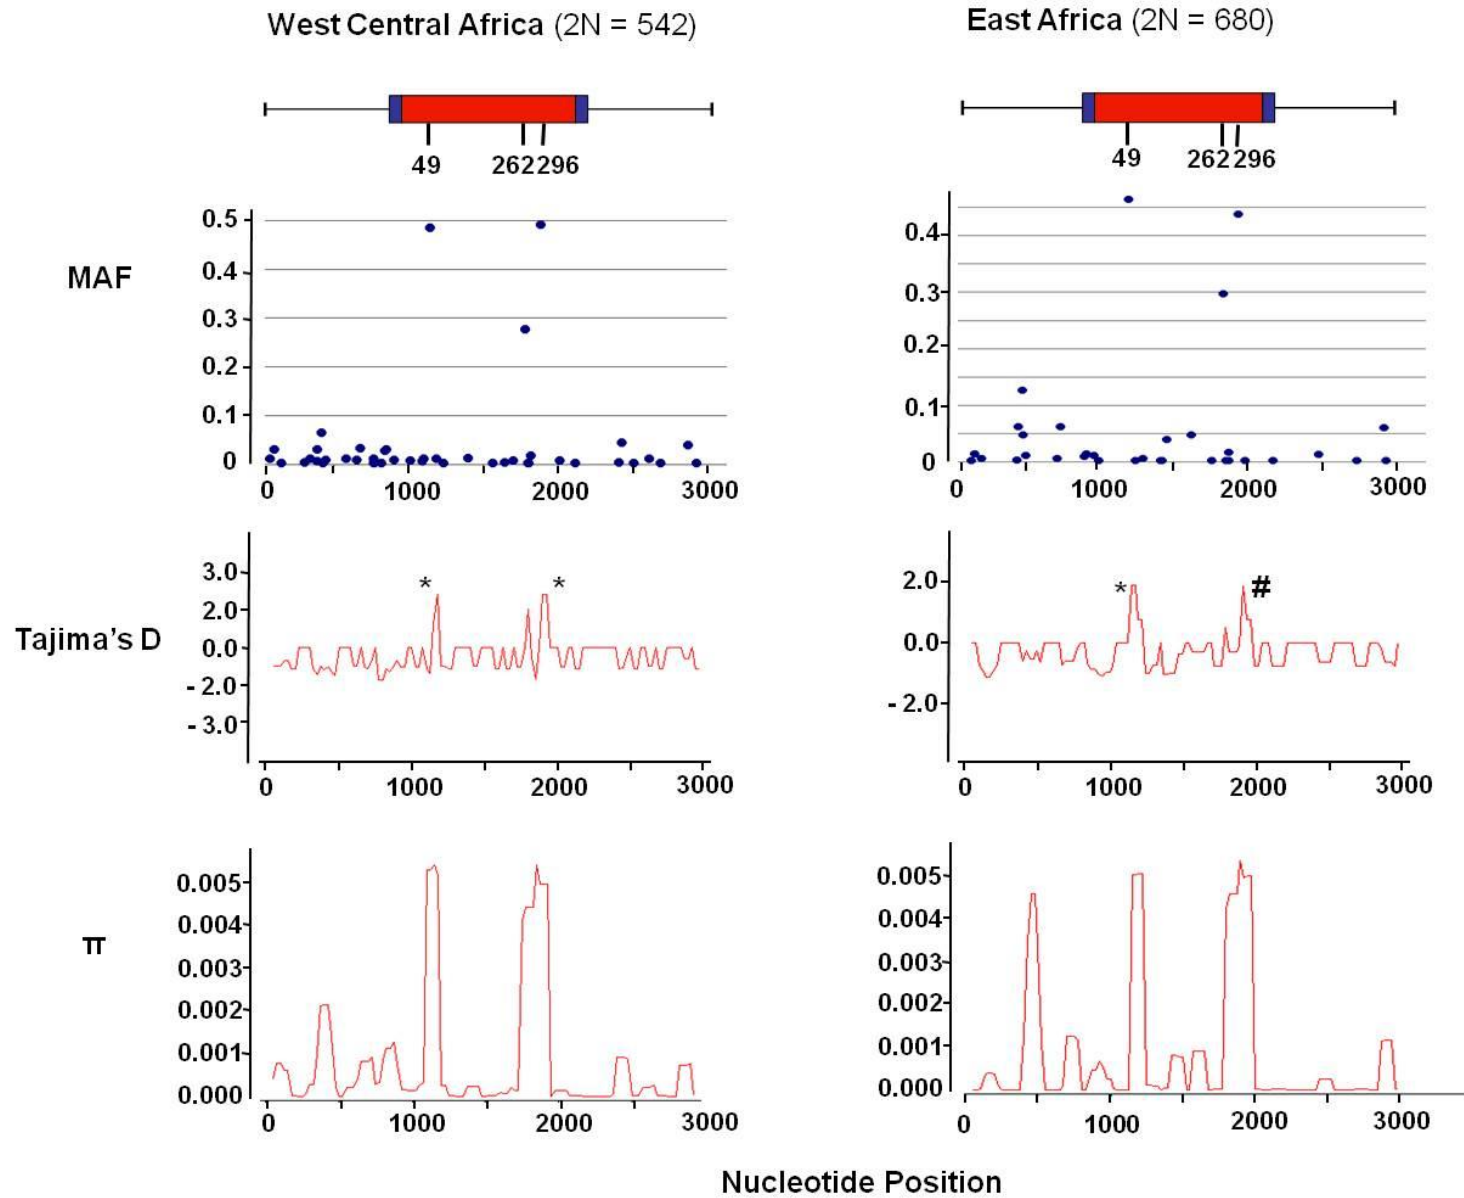



**Figure S6.** Sliding window analysis of coding and flanking noncoding regions of *TAS2R38*. Tajima's D and average pairwise differences between sequences ( $\pi$ ) were calculated across the 2,975 bp region in diverse populations from West Central Africa (Cameroon), East Africa (Kenya and Tanzania), and non-Africans. The minor allele frequency (MAF) was also calculated for each identified SNP within the 2,975 bp region. The gene structure of *TA2R38* is located at the top of each figure. Statistically significant p-values ( $P < 0.05$ ) are indicated by \*, while marginally significant p-values ( $0.05 < p < 0.1$ ) are indicated by #.

### **Supplemental References**

**Barrett, J. C., B. Fry, J. Maller, and M. J. Daly. 2005. Haploview: analysis and visualization of LD and haplotype maps. *Bioinformatics* 21:263-265.**

**Goddard, K. A. B., P. J. Hopkins, J. M. Hall, and J. S. Witte. 2000. Linkage disequilibrium and allele-frequency distributions for 114 single-nucleotide polymorphisms in five populations. *American Journal of Human Genetics* 66:216-234.**
