# Supplementary material
Source: PubMed Central journal article supplement (PMC3341826)
Supplement: supp_msr293_MSR293_Supplementary_Tables.pdf [file supp_msr293_MSR293_Supplementary_Tables.pdf]

### Supplemental Tables

| <u>Continent</u> | <u>Country</u> | <u>Ethnic Group</u> | <u>Language Family</u> | <u>Subsistence Pattern</u>     | <u>Number of Individuals</u> | <u>Source</u> |
|------------------|----------------|---------------------|------------------------|--------------------------------|------------------------------|---------------|
| Africa           | Cameroon       | Arabi Shuwa         | Afroasiatic            | Pastoralist                    | 18                           | SAT           |
| Africa           | Cameroon       | Banen               | Niger-Kordofanian      | Agriculturalist                | 1                            | SAT           |
| Africa           | Cameroon       | Bulu                | Niger-Kordofanian      | Agriculturalist                | 1                            | SAT           |
| Africa           | Cameroon       | Bangangte           | Niger-Kordofanian      | Agriculturalist                | 3                            | SAT           |
| Africa           | Cameroon       | Batanga             | Niger-Kordofanian      | Agriculturalist                | 21                           | SAT           |
| Africa           | Cameroon       | Bayangam            | Niger-Kordofanian      | Agriculturalist                | 1                            | SAT           |
| Africa           | Cameroon       | Djem                | Niger-Kordofanian      | Agriculturalist                | 1                            | SAT           |
| Africa           | Cameroon       | Duala               | Niger-Kordofanian      | Agriculturalist                | 1                            | SAT           |
| Africa           | Cameroon       | BgonkenxAbu         | Niger-Kordofanian      | Agriculturalist                | 1                            | SAT           |
| Africa           | Cameroon       | Evuzok              | Niger-Kordofanian      | Agriculturalist                | 1                            | SAT           |
| Africa           | Cameroon       | Ewondo              | Niger-Kordofanian      | Agriculturalist                | 2                            | SAT           |
| Africa           | Cameroon       | Fang                | Niger-Kordofanian      | Agriculturalist                | 14                           | SAT           |
| Africa           | Cameroon       | Fulani              | Niger-Kordofanian      | Pastoralist                    | 48                           | SAT           |
| Africa           | Cameroon       | Giziga              | Afroasiatic            | Agriculturalist                | 6                            | SAT           |
| Africa           | Cameroon       | Kanuri              | Nilo-Saharan           | Agriculturalist                | 26                           | SAT           |
| Africa           | Cameroon       | Kotoko              | Afroasiatic            | Agriculturalist                | 4                            | SAT           |
| Africa           | Cameroon       | Mabea               | Niger-Kordofanian      | Agriculturalist (with fishing) | 8                            | SAT           |
| Africa           | Cameroon       | Mada                | Afroasiatic            | Agriculturalist                | 23                           | SAT           |
| Africa           | Cameroon       | Mandara             | Afroasiatic            | Agriculturalist                | 14                           | SAT           |
| Africa           | Cameroon       | Molkwo              | Afroasiatic            | Agriculturalist                | 1                            | SAT           |
| Africa           | Cameroon       | Masa                | Afroasiatic            | Mixed Agriculturalist          | 4                            | SAT           |
| Africa           | Cameroon       | Ngumba              | Niger-Kordofanian      | Agriculturalist                | 3                            | SAT           |
| Africa           | Cameroon       | Nkunabembe          | Niger-Kordofanian      | Agriculturalist                | 1                            | SAT           |
| Africa           | Cameroon       | Baka Pygmy          | Niger-Kordofanian      | Hunter-gatherer                | 32                           | SAT           |

| <u>Continent</u> | <u>Country</u> | <u>Ethnic Group</u> | <u>Language Family</u> | <u>Subsistence Pattern</u> | <u>Number of Individuals</u> | <u>Source</u> |
|------------------|----------------|---------------------|------------------------|----------------------------|------------------------------|---------------|
| Africa           | Cameroon       | Podokwo             | Afroasiatic            | Agriculturalist            | 5                            | SAT           |
| Africa           | Cameroon       | Bakola Pygmy        | Niger-Kordofanian      | Hunter-gatherer            | 30                           | SAT           |
| Africa           | Cameroon       | Rimaibe             | Niger-Kordofanian      | Agriculturalist            | 1                            | SAT           |
| Africa           | Cameroon       | Tupuri              | Niger-Kordofanian      | Agriculturalist            | 1                            | SAT           |
| Africa           | Kenya          | Burji               | Afroasiatic            | Mixed Agriculturalist      | 17                           | SAT           |
| Africa           | Kenya          | Boni                | Afroasiatic            | Pastoralist                | 12                           | SAT           |
| Africa           | Kenya          | Borana              | Afroasiatic            | Pastoralist                | 30                           | SAT           |
| Africa           | Kenya          | Dikri Masaai        | Nilo-Saharan           | Pastoralist                | 2                            | SAT           |
| Africa           | Kenya          | El Molo             | Afroasiatic            | Hunter-gatherer            | 12                           | SAT           |
| Africa           | Kenya          | Gabra               | Afroasiatic            | Pastoralist                | 9                            | SAT           |
| Africa           | Kenya          | Gabramigo           | Afroasiatic            | Pastoralist                | 2                            | SAT           |
| Africa           | Kenya          | Gikuyu              | Niger-Kordofanian      | Agriculturalist            | 5                            | SAT           |
| Africa           | Kenya          | Gurreh              | Afroasiatic            | Pastoralist                | 3                            | SAT           |
| Africa           | Kenya          | Konso               | Afroasiatic            | Agriculturalist            | 12                           | SAT           |
| Africa           | Kenya          | Ilchamus            | Nilo-Saharan           | Pastoralist                | 15                           | SAT           |
| Africa           | Kenya          | Ilgwesi             | Nilo-Saharan           | Pastoralist                | 14                           | SAT           |
| Africa           | Kenya          | Luo                 | Nilo-Saharan           | Pastoralist                | 21                           | SAT           |
| Africa           | Kenya          | Luhya               | Niger-Kordofanian      | Agriculturalist            | 1                            | SAT           |
| Africa           | Kenya          | Maasai              | Nilo-Saharan           | Pastoralist                | 1                            | SAT           |
| Africa           | Kenya          | Mumonyot            | Nilo-Saharan           | Pastoralist                | 10                           | SAT           |
| Africa           | Kenya          | Ogiek               | Nilo-Saharan           | Hunter-gatherer            | 8                            | SAT           |
| Africa           | Kenya          | Orma                | Afroasiatic            | Pastoralist                | 3                            | SAT           |
| Africa           | Kenya          | Pokot               | Nilo-Saharan           | Pastoralist                | 10                           | SAT           |
| Africa           | Kenya          | Pare                | Niger-Kordofanian      | Agriculturalist            | 20                           | SAT           |
| Africa           | Kenya          | Samburu             | Nilo-Saharan           | Pastoralist                | 17                           | SAT           |
| Africa           | Kenya          | Sengwer             | Nilo-Saharan           | Hunter-gatherer            | 8                            | SAT           |
| Africa           | Kenya          | Sanye               | Afroasiatic            | Agriculturalist            | 13                           | SAT           |
| Africa           | Kenya          | Taita               | Niger-Kordofanian      | Agriculturalist            | 3                            | SAT           |
| Africa           | Kenya          | Tugen               | Nilo-Saharan           | Pastoralist                | 19                           | SAT           |

| <u>Continent</u> | <u>Country</u> | <u>Ethnic Group</u> | <u>Language Family</u> | <u>Subsistence Pattern</u> | <u>Number of Individuals</u> | <u>Source</u> |
|------------------|----------------|---------------------|------------------------|----------------------------|------------------------------|---------------|
| Africa           | Kenya          | Turkana             | Nilo-Saharan           | Pastoralist                | 26                           | SAT           |
| Africa           | Kenya          | Taveta              | Niger-Kordofanian      | Agriculturalist            | 5                            | SAT           |
| Africa           | Kenya          | Wata                | Afroasiatic            | Hunter-gatherer            | 2                            | SAT           |
| Africa           | Kenya          | Yaaku               | Afroasiatic            | Hunter-gatherer            | 17                           | SAT           |
| Africa           | Tanzania       | Hadza               | Khoesan                | Hunter-gatherer            | 12                           | SAT           |
| Africa           | Tanzania       | Sandawe             | Khoesan                | Hunter-gatherer            | 11                           | SAT           |
| Middle East      | Israel         | Palestinian         |                        |                            | 20                           | CEPH          |
| South Asia       | Pakistan       | Brahui              |                        |                            | 8                            | CEPH          |
| Europe           | Italy          | Sardinian           |                        |                            | 4                            | CEPH          |
| Europe           | Spain          | Spanish             |                        |                            | 16                           | AC            |
| East Asia        | China          | Chinese             |                        |                            | 62                           | CEPH          |
| East Asia        | Japan          | Japanese            |                        |                            | 9                            | CEPH          |
| Central America  | Mexico         | Nahua               |                        |                            | 13                           | MS            |

**Table S1.** List of samples used in the present study. The number of individuals for each population included for sequencing is shown. For African samples, linguistic family and subsistence patterns are also noted for each population. Sources of samples are coded as follows: SAT (Sarah A. Tishkoff), CEPH-HGDP (Human Genome Diversity Panel), AC (Ángel Carracedo) and MS (Mark Shriver). African populations with different patterns of subsistence have very divergent diets. For example, agriculturalist populations in Africa cultivate a range of crops, such as millet, rice, cassava and bananas, which are the main staples of their diet (<http://www.ethnologue.com/>; Fedders and Salvadori 1998). Pastoralist populations, which practice animal husbandry, subsist largely on milk and blood as staple foods from cattle, sheep and/or camels with occasional meat to supplement their diet (<http://www.ethnologue.com/>; Fedders and Salvadori 1998). Hunter-gatherer diets consist primarily of meat with some supplementation with tubers in a few hunter-gatherer groups (<http://www.ethnologue.com/>; Fedders and Salvadori 1998).

| <u>Nucleotide Position</u> | <u>Nucleotide Variation</u> | <u>Minor Allele Frequency</u> | <u>rs numbers</u> |
|----------------------------|-----------------------------|-------------------------------|-------------------|
| 8                          | A/G                         | 0.004                         |                   |
| 74                         | A/C                         | 0.004                         |                   |
| 76                         | G/C                         | 0.001                         |                   |
| 102                        | C/T                         | 0.017                         |                   |
| 147                        | C/T                         | 0.002                         |                   |
| 152                        | C/T                         | 0.001                         |                   |
| 173                        | A/G                         | 0.001                         |                   |
| 183                        | C/G                         | 0.001                         |                   |
| 308                        | A/G                         | 0.001                         |                   |
| 343                        | A/T                         | 0.004                         |                   |
| 385                        | G/A                         | 0.001                         |                   |
| 392                        | T/A                         | 0.002                         |                   |
| 393                        | A/T                         | 0.038                         | rs75675140        |
| 422                        | T/G                         | 0.078                         | rs61464348        |
| 428                        | A/G                         | 0.021                         |                   |
| 448                        | G/A                         | 0.008                         |                   |
| 524                        | A/G                         | 0.001                         |                   |
| 586                        | G/A                         | 0.004                         |                   |
| 656                        | C/T                         | 0.005                         |                   |
| 681                        | G/C                         | 0.038                         |                   |
| 767                        | G/T                         | 0.004                         |                   |
| 768                        | C/T                         | 0.001                         |                   |
| 775                        | G/A                         | 0.001                         |                   |
| 820                        | C/T                         | 0.001                         |                   |
| 839                        | C/T                         | 0.001                         |                   |
| 843                        | C/T                         | 0.015                         | rs80134535        |

| <u>Nucleotide Position</u> | <u>Nucleotide Variation</u> | <u>Minor Allele Frequency</u> | <u>rs numbers</u> |
|----------------------------|-----------------------------|-------------------------------|-------------------|
| 855                        | G/C                         | 0.017                         |                   |
| 907                        | G/A                         | 0.008                         |                   |
| 941                        | G/A                         | 0.001                         |                   |
| 1016                       | G/A                         | 0.003                         |                   |
| 1092                       | G/A                         | 0.002                         |                   |
| 1105                       | G/A                         | 0.004                         |                   |
| <b>1144</b>                | <b>C/G</b>                  | <b>0.476</b>                  | <b>rs713598</b>   |
| 1190                       | G/A                         | 0.005                         |                   |
| 1238                       | A/G                         | 0.003                         |                   |
| 1361                       | T/C                         | 0.001                         |                   |
| 1367                       | G/A                         | 0.001                         |                   |
| 1402                       | T/G                         | 0.024                         |                   |
| 1415                       | A/G                         | 0.007                         |                   |
| 1568                       | A/G                         | 0.021                         |                   |
| 1648                       | A/C                         | 0.001                         |                   |
| 1703                       | G/A                         | 0.003                         |                   |
| <b>1784</b>                | <b>C/T</b>                  | <b>0.311</b>                  | <b>rs1726866</b>  |
| 1801                       | C/T                         | 0.001                         |                   |
| 1808                       | T/G                         | 0.001                         |                   |
| 1819                       | C/T                         | 0.013                         |                   |
| 1821                       | C/T                         | 0.001                         |                   |
| 1822                       | G/T                         | 0.001                         |                   |
| <b>1885</b>                | <b>G/A</b>                  | <b>0.462</b>                  | <b>rs10246939</b> |
| 1931                       | T/C                         | 0.001                         |                   |
| 2012                       | G/A                         | 0.003                         |                   |
| 2119                       | A/G                         | 0.003                         |                   |
| 2410                       | C/G                         | 0.001                         |                   |

| <u>Nucleotide Position</u> | <u>Nucleotide Variation</u> | <u>Minor Allele Frequency</u> | <u>rs numbers</u> |
|----------------------------|-----------------------------|-------------------------------|-------------------|
| 2431                       | C/T                         | 0.023                         | rs73740218        |
| 2508                       | T/C                         | 0.001                         |                   |
| 2614                       | T/G                         | 0.004                         |                   |
| 2687                       | T/C                         | 0.001                         |                   |
| 2872                       | C/T                         | 0.040                         | rs73540580        |
| 2885                       | G/A                         | 0.001                         |                   |
| 2927                       | C/T                         | 0.001                         |                   |
| 2933                       | T/C                         | 0.001                         |                   |

**Table S2.** Minor Allele Frequency of SNPs in global populations. We identified 61 SNPs in the 2,975 bp region in African and non-African populations. Allelic variation, nucleotide position, and minor allele frequency are given for each marker; SNP markers with corresponding rs numbers in the dbSNP database are also indicated in this table. Markers 33, 43 and 49 in bold represent the common SNPs associated with PTC bitter taste sensitivity.

|                     | Cameroon       | Cameroon          | Cameroon       | Cameroon          | Cameroon      | Kenya          | Kenya         | Kenya          | Kenya          | Tanzania      |
|---------------------|----------------|-------------------|----------------|-------------------|---------------|----------------|---------------|----------------|----------------|---------------|
| Nucleotide Position | AA<br>(2N=146) | Fulani<br>(2N=96) | NK<br>(2N=124) | Pygmy<br>(2N=124) | NS<br>(2N=52) | AA<br>(2N=264) | NK<br>(2N=68) | NS<br>(2N=260) | Luo<br>(2N=42) | KS<br>(2N=46) |
| 8                   | 0.000          | 0.000             | 0.000          | 0.048             | 0.000         | 0.000          | 0.000         | 0.000          | 0.000          | 0.000         |
| 74                  | 0.000          | 0.000             | 0.000          | 0.048             | 0.000         | 0.000          | 0.000         | 0.000          | 0.000          | 0.000         |
| 76                  | 0.000          | 0.000             | 0.000          | 0.000             | 0.000         | 0.004          | 0.000         | 0.000          | 0.000          | 0.000         |
| 102                 | 0.014          | 0.010             | 0.016          | 0.081             | 0.019         | 0.008          | 0.015         | 0.012          | 0.068          | 0.000         |
| 147                 | 0.000          | 0.000             | 0.000          | 0.000             | 0.000         | 0.000          | 0.000         | 0.012          | 0.000          | 0.000         |
| 152                 | 0.000          | 0.000             | 0.000          | 0.000             | 0.019         | 0.000          | 0.000         | 0.000          | 0.000          | 0.000         |
| 308                 | 0.000          | 0.000             | 0.000          | 0.016             | 0.000         | 0.000          | 0.000         | 0.000          | 0.000          | 0.000         |
| 343                 | 0.000          | 0.000             | 0.000          | 0.048             | 0.000         | 0.000          | 0.000         | 0.000          | 0.000          | 0.000         |
| 385                 | 0.000          | 0.000             | 0.000          | 0.000             | 0.000         | 0.008          | 0.000         | 0.000          | 0.000          | 0.000         |
| 392                 | 0.000          | 0.000             | 0.024          | 0.000             | 0.000         | 0.000          | 0.000         | 0.000          | 0.000          | 0.000         |
| 393                 | 0.021          | 0.010             | 0.016          | 0.081             | 0.019         | 0.083          | 0.061         | 0.038          | 0.068          | 0.000         |
| 422                 | 0.062          | 0.021             | 0.097          | 0.081             | 0.038         | 0.129          | 0.076         | 0.108          | 0.295          | 0.043         |
| 428                 | 0.007          | 0.000             | 0.000          | 0.000             | 0.000         | 0.076          | 0.045         | 0.027          | 0.000          | 0.000         |
| 448                 | 0.007          | 0.000             | 0.024          | 0.008             | 0.000         | 0.011          | 0.000         | 0.015          | 0.000          | 0.000         |
| 586                 | 0.000          | 0.000             | 0.000          | 0.048             | 0.000         | 0.000          | 0.000         | 0.000          | 0.000          | 0.000         |
| 656                 | 0.000          | 0.000             | 0.008          | 0.032             | 0.000         | 0.000          | 0.000         | 0.008          | 0.023          | 0.000         |
| 681                 | 0.021          | 0.010             | 0.016          | 0.089             | 0.019         | 0.083          | 0.061         | 0.038          | 0.068          | 0.000         |
| 767                 | 0.000          | 0.000             | 0.000          | 0.048             | 0.000         | 0.000          | 0.000         | 0.000          | 0.000          | 0.000         |
| 768                 | 0.007          | 0.000             | 0.000          | 0.000             | 0.000         | 0.000          | 0.000         | 0.000          | 0.000          | 0.000         |
| 775                 | 0.000          | 0.010             | 0.000          | 0.000             | 0.000         | 0.000          | 0.000         | 0.000          | 0.000          | 0.000         |
| 820                 | 0.000          | 0.000             | 0.008          | 0.000             | 0.000         | 0.000          | 0.000         | 0.000          | 0.000          | 0.022         |
| 843                 | 0.027          | 0.021             | 0.024          | 0.032             | 0.038         | 0.004          | 0.045         | 0.004          | 0.023          | 0.022         |
| 855                 | 0.014          | 0.010             | 0.016          | 0.081             | 0.019         | 0.008          | 0.015         | 0.012          | 0.068          | 0.000         |
| 907                 | 0.007          | 0.000             | 0.024          | 0.008             | 0.000         | 0.011          | 0.000         | 0.015          | 0.000          | 0.000         |
| 941                 | 0.000          | 0.000             | 0.000          | 0.000             | 0.000         | 0.004          | 0.000         | 0.000          | 0.000          | 0.000         |
| 1016                | 0.000          | 0.000             | 0.024          | 0.008             | 0.000         | 0.000          | 0.000         | 0.000          | 0.000          | 0.000         |

|                     | Cameroon       | Cameroon          | Cameroon       | Cameroon          | Cameroon      | Kenya          | Kenya         | Kenya          | Kenya          | Tanzania      |
|---------------------|----------------|-------------------|----------------|-------------------|---------------|----------------|---------------|----------------|----------------|---------------|
| Nucleotide Position | AA<br>(2N=146) | Fulani<br>(2N=96) | NK<br>(2N=124) | Pygmy<br>(2N=124) | NS<br>(2N=52) | AA<br>(2N=264) | NK<br>(2N=68) | NS<br>(2N=260) | Luo<br>(2N=42) | KS<br>(2N=46) |
| 1092                | 0.000          | 0.010             | 0.016          | 0.000             | 0.000         | 0.000          | 0.000         | 0.000          | 0.000          | 0.000         |
| 1105                | 0.000          | 0.000             | 0.000          | 0.048             | 0.000         | 0.000          | 0.000         | 0.000          | 0.000          | 0.000         |
| 1144                | 0.493          | 0.448             | 0.387          | 0.460             | 0.404         | 0.492          | 0.485         | 0.435          | 0.341          | 0.413         |
| 1190                | 0.007          | 0.010             | 0.024          | 0.000             | 0.019         | 0.000          | 0.000         | 0.004          | 0.000          | 0.000         |
| 1238                | 0.007          | 0.000             | 0.000          | 0.000             | 0.000         | 0.004          | 0.015         | 0.004          | 0.000          | 0.000         |
| 1361                | 0.000          | 0.000             | 0.000          | 0.000             | 0.000         | 0.000          | 0.000         | 0.004          | 0.000          | 0.000         |
| 1367                | 0.000          | 0.000             | 0.000          | 0.000             | 0.000         | 0.000          | 0.000         | 0.004          | 0.000          | 0.000         |
| 1402                | 0.021          | 0.010             | 0.000          | 0.008             | 0.038         | 0.072          | 0.015         | 0.019          | 0.000          | 0.043         |
| 1568                | 0.007          | 0.000             | 0.000          | 0.000             | 0.000         | 0.076          | 0.045         | 0.027          | 0.000          | 0.000         |
| 1648                | 0.007          | 0.010             | 0.000          | 0.000             | 0.000         | 0.000          | 0.000         | 0.000          | 0.000          | 0.000         |
| 1703                | 0.000          | 0.000             | 0.000          | 0.032             | 0.000         | 0.004          | 0.000         | 0.000          | 0.000          | 0.000         |
| 1784                | 0.267          | 0.302             | 0.298          | 0.210             | 0.365         | 0.318          | 0.227         | 0.312          | 0.182          | 0.261         |
| 1801                | 0.007          | 0.000             | 0.000          | 0.000             | 0.000         | 0.000          | 0.000         | 0.004          | 0.000          | 0.000         |
| 1808                | 0.000          | 0.010             | 0.000          | 0.000             | 0.000         | 0.000          | 0.000         | 0.000          | 0.000          | 0.000         |
| 1819                | 0.007          | 0.000             | 0.065          | 0.000             | 0.019         | 0.023          | 0.000         | 0.008          | 0.045          | 0.000         |
| 1822                | 0.000          | 0.000             | 0.000          | 0.000             | 0.000         | 0.000          | 0.000         | 0.004          | 0.000          | 0.000         |
| 1885                | 0.486          | 0.448             | 0.395          | 0.460             | 0.423         | 0.470          | 0.470         | 0.412          | 0.341          | 0.413         |
| 1931                | 0.000          | 0.000             | 0.000          | 0.000             | 0.000         | 0.000          | 0.000         | 0.004          | 0.000          | 0.000         |
| 2012                | 0.000          | 0.000             | 0.000          | 0.032             | 0.000         | 0.000          | 0.000         | 0.000          | 0.000          | 0.000         |
| 2119                | 0.000          | 0.010             | 0.000          | 0.000             | 0.000         | 0.000          | 0.000         | 0.004          | 0.000          | 0.000         |
| 2410                | 0.000          | 0.000             | 0.000          | 0.016             | 0.000         | 0.000          | 0.000         | 0.000          | 0.000          | 0.000         |
| 2431                | 0.089          | 0.073             | 0.016          | 0.000             | 0.038         | 0.023          | 0.015         | 0.004          | 0.000          | 0.000         |
| 2508                | 0.000          | 0.000             | 0.008          | 0.000             | 0.000         | 0.000          | 0.000         | 0.000          | 0.000          | 0.000         |
| 2614                | 0.000          | 0.000             | 0.000          | 0.048             | 0.000         | 0.000          | 0.000         | 0.000          | 0.000          | 0.000         |
| 2687                | 0.000          | 0.000             | 0.000          | 0.008             | 0.000         | 0.004          | 0.000         | 0.000          | 0.000          | 0.000         |
| 2872                | 0.048          | 0.021             | 0.065          | 0.024             | 0.019         | 0.038          | 0.030         | 0.054          | 0.273          | 0.022         |
| 2885                | 0.000          | 0.000             | 0.000          | 0.000             | 0.000         | 0.000          | 0.000         | 0.000          | 0.023          | 0.000         |



|                     | Cameroon       | Cameroon          | Cameroon       | Cameroon          | Cameroon      | Kenya          | Kenya         | Kenya          | Kenya          | Tanzania      |
|---------------------|----------------|-------------------|----------------|-------------------|---------------|----------------|---------------|----------------|----------------|---------------|
| Nucleotide Position | AA<br>(2N=146) | Fulani<br>(2N=96) | NK<br>(2N=114) | Pygmy<br>(2N=124) | NS<br>(2N=52) | AA<br>(2N=264) | NK<br>(2N=68) | NS<br>(2N=260) | Luo<br>(2N=42) | KS<br>(2N=46) |
| 2927                | 0.000          | 0.000             | 0.008          | 0.000             | 0.000         | 0.000          | 0.000         | 0.000          | 0.000          | 0.000         |

**Table S3.** Minor Allele Frequency of SNPs in linguistically and/or culturally distinct African populations. Niger-Kordofanian (NK), Nilo-Saharan (NS), Afroasiatic (AA), and Khoesan (KS) represent groups of populations composed of individuals that share genetic and linguistic similarities. Genetically distinct populations within language families were classified as separate groups (for example, Fulani Niger-Kordofanian-speakers, Pygmy Niger-Kordofanian-speakers, and Luo Nilo-Saharan-speakers)(Tishkoff et al. 2009). 2N is the number of chromosomes analyzed in each linguistically and/or culturally defined group.

| Nucleotide Position | 1 | 9 | 1 | 1 | 1 | 2 | 3 | 3 | 4 | 4 | 5 | 6 | 7 | 7 | 8 | 8 | 8 | 8 | 8 | 8 | 9 |                     |  |
|---------------------|---|---|---|---|---|---|---|---|---|---|---|---|---|---|---|---|---|---|---|---|---|---------------------|--|
|                     | 7 | 3 | 0 | 4 | 9 | 3 | 6 | 6 | 0 | 1 | 6 | 4 | 0 | 8 | 0 | 0 | 2 | 2 | 2 | 2 | 3 | 2                   |  |
| Amino Acid Position | 6 | 3 | 3 | 4 | 6 | 8 | 1 | 1 | 1 | 1 | 1 | 2 | 2 | 2 | 2 | 2 | 2 | 2 | 2 | 2 | 3 |                     |  |
|                     |   | 1 | 6 | 9 | 4 | 0 | 2 | 2 | 3 | 3 | 9 | 1 | 3 | 6 | 6 | 7 | 7 | 7 | 7 | 9 | 1 |                     |  |
|                     |   |   |   |   |   |   | 1 | 3 | 5 | 9 | 0 | 7 | 5 | 2 | 8 | 0 | 4 | 4 | 5 | 6 | 1 |                     |  |
| Variants            | G | G | G | C | G | A | T | G | T | A | A | A | G | C | C | T | C | C | G | G | T | Haplotype Frequency |  |
|                     | A | A | A | G | A | G | C | A | G | G | G | C | A | T | T | G | T | A | A | C |   |                     |  |
| H1 (AAI)            | R | L | V | A | R | H | L | R | W | K | N | T | R | A | P | L | R | R | D | I | I | 0.1090              |  |
| H2 (AAV)            | R | L | V | A | R | H | L | R | W | K | N | T | R | A | P | L | R | R | D | V | I | 0.0135              |  |
| H3 (AAI)            | R | L | V | A | R | H | L | R | W | K | N | T | R | A | P | L | C | R | D | I | I | 0.0135              |  |
| H4 (AVI)            | R | L | V | A | R | H | L | R | W | K | N | T | R | V | P | L | R | R | D | I | I | 0.3001              |  |
| H5 (AVI)            | R | L | V | A | R | H | L | R | W | K | N | T | R | V | P | L | R | R | D | I | T | 0.0007              |  |
| H6 (AVI)            | R | L | V | A | R | H | L | R | W | K | N | T | R | V | P | L | R | G | D | I | I | 0.0007              |  |
| H7 (AVI)            | R | L | V | A | R | H | L | R | W | K | N | T | R | V | P | R | R | R | D | I | I | 0.0007              |  |
| H8 (AVI)            | R | L | V | A | R | H | L | R | W | K | N | P | R | V | P | L | R | R | D | I | I | 0.0013              |  |
| H9 (AAI)            | R | L | V | A | R | H | L | R | G | K | N | T | R | A | P | L | R | R | D | I | I | 0.0236              |  |
| H10 (AAI)           | R | L | V | A | R | H | P | R | W | K | N | T | R | A | P | L | R | R | D | I | I | 0.0007              |  |
| H11 (AAI)           | R | L | V | A | R | R | L | R | W | K | N | T | R | A | P | L | R | R | D | I | I | 0.0020              |  |
| H12 (AAI)           | R | L | V | A | R | R | L | H | W | K | N | T | R | A | P | L | R | R | N | I | I | 0.0007              |  |
| H13 (AVI)           | R | L | V | A | Q | H | L | R | W | K | N | T | R | V | P | L | R | R | D | I | I | 0.0047              |  |
| H14 (PAV)           | R | L | V | P | R | H | L | R | W | K | N | T | R | A | P | L | R | R | D | V | I | 0.4872              |  |
| H15 (PAV)           | R | L | V | P | R | H | L | R | W | K | N | T | R | A | S | L | R | R | D | V | I | 0.0013              |  |
| H16 (PAV)           | R | L | V | P | R | H | L | R | W | K | N | T | H | A | P | L | R | R | D | V | I | 0.0034              |  |
| H17 (PAV)           | R | L | V | P | R | H | L | R | W | K | S | T | R | A | P | L | R | R | D | V | I | 0.0209              |  |
| H18 (PAV)           | R | L | V | P | R | H | L | R | W | R | N | T | R | A | P | L | R | R | D | V | I | 0.0074              |  |
| H19 (PAV)           | R | L | I | P | R | H | L | R | W | K | N | T | R | A | P | L | R | R | D | V | I | 0.0040              |  |
| H20 (AAI)           | R | L | V | A | R | H | L | R | W | K | N | T | R | A | P | L | R | R | D | I | I | 0.0020              |  |
| H21 (AVI)           | H | L | V | A | R | H | L | R | W | K | N | T | R | V | P | L | R | R | D | I | I | 0.0027              |  |

**Table S4. Haplotype and nucleotide variation in the *TAS2R38* coding region.** The first row in this table depicts variable nucleotide positions in the coding region of *TAS2R38* and the second row denotes the corresponding amino acid position. The third row indicates nucleotide variation with the nucleotides in black representing the major allele and the nucleotide in red representing the minor allele. Listed below the nucleotide polymorphisms are rows of haplotypes with their corresponding haplotype frequencies summarized at the end of each row. The letters within each haplotype represent amino acids. Amino acids in red are nonsynonymous amino acid substitutions corresponding to the nonsynonymous nucleotide variants near the top of each column. Amino acids in green represent synonymous amino acid substitutions. Columns shaded in yellow indicate the three common variable nucleotide/amino acid sites associated with PTC sensitivity.

| Population                        | Domain         | 2N  | Sites | S  | $\pi$   | $\theta$ | Tajima's <i>D</i> |
|-----------------------------------|----------------|-----|-------|----|---------|----------|-------------------|
| <b>Cameroon</b>                   |                |     |       |    |         |          |                   |
| <b>Afro-Asiatic</b>               | Coding         | 146 | 1002  | 10 | 0.00152 | 0.0018   | -0.37             |
|                                   | 5' Non-coding  |     | 999   | 10 | 0.00036 | 0.0018   | -1.94 *           |
|                                   | 3' Non-coding  |     | 974   | 2  | 0.00026 | 0.0004   | -0.42             |
|                                   | Total (2975bp) |     | 2975  | 22 | 0.00072 | 0.0013   | -1.29             |
| <b>Fulani (Niger-Kordofanian)</b> | Coding         | 96  | 1002  | 8  | 0.00153 | 0.0016   | -0.04             |
|                                   | 5' Non-coding  |     | 999   | 7  | 0.00019 | 0.0014   | -2.04 *           |
|                                   | 3' Non-coding  |     | 974   | 3  | 0.00020 | 0.0006   | -1.19             |
|                                   | Total (2975bp) |     | 2975  | 18 | 0.00064 | 0.0012   | -1.30             |
| <b>Pygmy (Niger-Kordofanian)</b>  | Coding         | 124 | 1002  | 7  | 0.00152 | 0.0013   | 0.39              |
|                                   | 5' Non-coding  |     | 999   | 15 | 0.00142 | 0.0028   | -1.32             |
|                                   | 3' Non-coding  |     | 974   | 5  | 0.00026 | 0.0010   | -1.50             |
|                                   | Total (2975bp) |     | 2975  | 27 | 0.00107 | 0.0017   | -1.06             |
| <b>Niger-Kordofanian</b>          | Coding         | 124 | 1002  | 7  | 0.00162 | 0.0013   | 0.53              |
|                                   | 5' Non-coding  |     | 999   | 11 | 0.00057 | 0.0021   | -1.86 *           |
|                                   | 3' Non-coding  |     | 974   | 3  | 0.00019 | 0.0006   | -1.18             |
|                                   | Total (2975bp) |     | 2975  | 21 | 0.00080 | 0.0013   | -1.14             |
| <b>Nilo-Saharan</b>               | Coding         | 52  | 1002  | 6  | 0.00161 | 0.0016   | 0.54              |
|                                   | 5' Non-coding  |     | 999   | 7  | 0.00034 | 0.0011   | -2.04 *           |
|                                   | 3' Non-coding  |     | 974   | 2  | 0.00012 | 0.0005   | -1.31             |
|                                   | Total (2975bp) |     | 2975  | 15 | 0.00070 | 0.0011   | -1.15             |

| Population                | Domain         | 2N  | Sites | S  | $\pi$   | $\theta$ | Tajima's <i>D</i> |
|---------------------------|----------------|-----|-------|----|---------|----------|-------------------|
| <b>All Cameroonians</b>   | Coding         | 542 | 1002  | 15 | 0.00157 | 0.0022   | -0.65             |
|                           | 5' Non-coding  |     | 999   | 21 | 0.00062 | 0.0031   | -1.97 *           |
|                           | 3' Non-coding  |     | 974   | 9  | 0.00022 | 0.0013   | -1.17 #           |
|                           | Total (2975bp) |     | 2975  | 45 | 0.00081 | 0.0022   | -1.73 #           |
| <b>Kenya</b>              |                |     |       |    |         |          |                   |
| <b>Afro-Asiatic</b>       | Coding         | 264 | 1002  | 8  | 0.00177 | 0.0013   | 0.77              |
|                           | 5' Non-coding  |     | 999   | 12 | 0.00075 | 0.0019   | -1.41             |
|                           | 3' Non-coding  |     | 974   | 3  | 0.00013 | 0.0005   | -1.14             |
|                           | Total (2975bp) |     | 2975  | 23 | 0.00088 | 0.0012   | -0.75             |
| <b>Nilo-Saharan</b>       | Coding         | 260 | 1002  | 13 | 0.00157 | 0.0021   | -0.62             |
|                           | 5' Non-coding  |     | 999   | 11 | 0.00052 | 0.0017   | -1.61 #           |
|                           | 3' Non-coding  |     | 974   | 3  | 0.00012 | 0.0005   | -1.17             |
|                           | Total (2975bp) |     | 2975  | 27 | 0.00074 | 0.0014   | -1.34             |
| <b>Niger Kordofanian</b>  | Coding         | 68  | 1002  | 6  | 0.00152 | 0.0013   | 0.49              |
|                           | 5' Non-coding  |     | 999   | 7  | 0.00058 | 0.0014   | -1.47             |
|                           | 3' Non-coding  |     | 974   | 2  | 0.00009 | 0.0004   | -1.32             |
|                           | Total (2975bp) |     | 2975  | 15 | 0.00073 | 0.0010   | -0.87             |
| <b>Luo (Nilo Saharan)</b> | Coding         | 42  | 1002  | 4  | 0.00131 | 0.0009   | 1.00              |
|                           | 5' Non-coding  |     | 999   | 7  | 0.00099 | 0.0015   | -0.97             |
|                           | 3' Non-coding  |     | 974   | 2  | 0.00046 | 0.0005   | -0.03             |
|                           | Total (2975bp) |     | 2975  | 13 | 0.00092 | 0.0010   | -0.19             |
| <b>All Kenyans</b>        | Coding         | 634 | 1002  | 14 | 0.00163 | 0.0020   | -0.40             |
|                           | 5' Non-coding  |     | 999   | 14 | 0.00066 | 0.0020   | -1.46             |
|                           | 3' Non-coding  |     | 974   | 5  | 0.00015 | 0.0007   | -1.33             |
|                           | Total (2975bp) |     | 2975  | 33 | 0.00082 | 0.0016   | -1.23             |

| Population                                  | Domain         | 2N   | Sites | S  | $\pi$   | $\theta$ | Tajima's D |
|---------------------------------------------|----------------|------|-------|----|---------|----------|------------|
| <b>Tanzania</b>                             |                |      |       |    |         |          |            |
| <b>Khoesan-speakers<br/>(Hadza/Sandawe)</b> | Coding         | 46   | 1002  | 4  | 0.00147 | 0.0009   | 1.42       |
|                                             | 5' Non-coding  |      | 999   | 3  | 0.00017 | 0.0007   | -1.58 #    |
|                                             | 3' Non-coding  |      | 974   | 1  | 0.00004 | 0.0002   | -1.11      |
|                                             | Total (2975bp) |      | 2975  | 8  | 0.00057 | 0.0006   | -0.20      |
| <b>All Africans</b>                         | Coding         | 1222 | 1002  | 19 | 0.00160 | 0.0025   | -0.80      |
|                                             | 5' Non-coding  |      | 999   | 25 | 0.00064 | 0.0033   | -1.92 *    |
|                                             | 3' Non-coding  |      | 974   | 10 | 0.00018 | 0.0013   | -1.69 #    |
|                                             | Total (2975bp) |      | 2975  | 54 | 0.00082 | 0.0024   | -1.73 *    |
| <b>Non-Africans</b>                         |                |      |       |    |         |          |            |
|                                             | Coding         | 264  | 1002  | 5  | 0.00155 | 0.0008   | 1.71       |
|                                             | 5' Non-coding  |      | 999   | 5  | 0.00005 | 0.0008   | -1.75 #    |
|                                             | 3' Non-coding  |      | 974   | 3  | 0.00004 | 0.0005   | -1.42      |
|                                             | Total (2975bp) |      | 2975  | 13 | 0.00055 | 0.0007   | -0.38      |

**Table S5.** Nucleotide diversity statistics and tests of neutrality. Tajima's D was calculated for Africans and for non-Africans in the coding and non-coding regions of the *TAS2R38* gene. 2N is the number of chromosomes analyzed in each population. S is number of segregating sites.  $\pi$  is the average pairwise nucleotide differences per site.  $\theta$  is Waterson's estimate of heterozygosity per site. Significance was calculated with coalescence simulations assuming constant population size. Significant p-values ( $p < 0.05$ ) are indicated by \* while marginally significant p-values ( $0.05 < P < 0.01$ ) are indicated by #.

(A)

|            |                         |                         | <u>West Central Africa (Cameroon)</u> |                   |                   |                                        |
|------------|-------------------------|-------------------------|---------------------------------------|-------------------|-------------------|----------------------------------------|
| Haplotypes | Afroasiatic<br>(2N=146) | Nilo-Saharan<br>(2N=52) | Niger-Kordofanian<br>(2N=124)         | Fulani<br>(2N=96) | Pygmy<br>(2N=124) | Total number of haplotypes<br>(2N=542) |
| 1 (AAI)    | 27 (0.185)              | 8 (0.154)               | 28 (0.226)                            | 12 (0.125)        | 30 (0.242)        | 105 (0.194)                            |
| 2 (AAV)    | 1 (0.007)               | 1 (0.0192)              | 1 (0.008)                             | 0                 | 0                 | 3 (0.006)                              |
| 3 (AAI)    | 1 (0.007)               | 1 (0.0192)              | 8 (0.065)                             | 0                 | 0                 | 10 (0.018)                             |
| 4 (AVI)    | 37 (0.253)              | 18 (0.346)              | 31 (0.250)                            | 26 (0.271)        | 25 (0.202)        | 137 (0.253)                            |
| 5 (AVI)    | 0                       | 0                       | 0                                     | 0                 | 0                 | 0                                      |
| 6 (AVI)    | 0                       | 0                       | 0                                     | 0                 | 0                 | 0                                      |
| 7 (AVI)    | 0                       | 0                       | 0                                     | 1 (0.010)         | 0                 | 1 (0.002)                              |
| 8 (AVI)    | 1 (0.007)               | 0                       | 0                                     | 1 (0.010)         | 0                 | 2 (0.004)                              |
| 9 (AAI)    | 3 (0.021)               | 2 (0.039)               | 0                                     | 1 (0.010)         | 1 (0.008)         | 7 (0.013)                              |
| 10 (AAI)   | 0                       | 0                       | 0                                     | 0                 | 0                 | 0                                      |
| 11 (AAI)   | 1 (0.007)               | 0                       | 0                                     | 0                 | 0                 | 1 (0.002)                              |
| 12 (AAI)   | 0                       | 0                       | 0                                     | 0                 | 0                 | 0                                      |
| 13 (AVI)   | 1 (0.007)               | 1 (0.0192)              | 3 (0.024)                             | 1 (0.010)         | 0                 | 6 (0.011)                              |
| 14 (PAV)   | 72 (0.493)              | 21 (0.403)              | 48 (0.387)                            | 53 (0.552)        | 57 (0.460)        | 251 (0.463)                            |
| 15 (PAV)   | 1 (0.007)               | 0                       | 0                                     | 0                 | 0                 | 1 (0.002)                              |
| 16 (PAV)   | 0                       | 0                       | 0                                     | 0                 | 4 (0.032)         | 4 (0.007)                              |
| 17 (PAV)   | 1 (0.007)               | 0                       | 0                                     | 0                 | 0                 | 1 (0.002)                              |
| 18 (PAV)   | 0                       | 0                       | 0                                     | 0                 | 0                 | 0                                      |
| 19 (PAV)   | 0                       | 0                       | 0                                     | 0                 | 6 (0.048)         | 6 (0.011)                              |
| 20 (AAI)   | 0                       | 0                       | 2 (0.016)                             | 1 (0.010)         | 0                 | 3 (0.006)                              |
| 21 (AVI)   | 0                       | 0                       | 3 (0.024)                             | 0                 | 1 (0.008)         | 4 (0.007)                              |

(B)

|            |                      |                       | East Africa (Kenya and Tanzania) |             |                                 |                                     |
|------------|----------------------|-----------------------|----------------------------------|-------------|---------------------------------|-------------------------------------|
| Haplotypes | Afroasiatic (2N=264) | Nilo-Saharan (2N=260) | Niger-Kordofanian (2N=68)        | Luo (2N=42) | Hadza/Sandawe (Khoesan) (2N=46) | Total number of haplotypes (2N=680) |
| H1 (AAI)   | 14 (0.053)           | 17 (0.065)            | 15 (0.221)                       | 4 (0.095)   | 5 (0.109)                       | 55 (0.081)                          |
| H2 (AAV)   | 10 (0.0379)          | 6 (0.023)             | 1 (0.015)                        | 0           | 0                               | 17 (0.025)                          |
| H3 (AAI)   | 6 (0.023)            | 2 (0.008)             | 0                                | 2 (0.048)   | 0                               | 10 (0.0147)                         |
| H4 (AVI)   | 84 (0.318)           | 79 (0.304)            | 15 (0.221)                       | 8 (0.190)   | 12 (0.261)                      | 198 (0.291)                         |
| H5 (AVI)   | 0                    | 1 (0.004)             | 0                                | 0           | 0                               | 1 (0.001)                           |
| H6 (AVI)   | 0                    | 0                     | 0                                | 0           | 0                               | 0                                   |
| H7 (AVI)   | 0                    | 0                     | 0                                | 0           | 0                               | 0                                   |
| H8 (AVI)   | 0                    | 0                     | 0                                | 0           | 0                               | 0                                   |
| H9 (AAI)   | 19 (0.072)           | 5 (0.019)             | 1 (0.015)                        | 0           | 2 (0.043)                       | 27 (0.040)                          |
| H10 (AAI)  | 0                    | 1 (0.004)             | 0                                | 0           | 0                               | 1 (0.001)                           |
| H11 (AAI)  | 1 (0.004)            | 0                     | 1 (0.015)                        | 0           | 0                               | 2 (0.003)                           |
| H12 (AAI)  | 0                    | 1 (0.004)             | 0                                | 0           | 0                               | 1 (0.001)                           |
| H13 (AVI)  | 0                    | 1 (0.004)             | 0                                | 0           | 0                               | 1 (0.001)                           |
| H14 (PAV)  | 109 (0.413)          | 139 (0.535)           | 32 (0.471)                       | 28 (0.667)  | 27 (0.587)                      | 335 (0.493)                         |
| H15 (PAV)  | 0                    | 1 (0.004)             | 0                                | 0           | 0                               | 1 (0.001)                           |
| H16 (PAV)  | 1 (0.004)            | 0                     | 0                                | 0           | 0                               | 1 (0.001)                           |
| H17 (PAV)  | 20 (0.076)           | 7 (0.027)             | 3 (0.044)                        | 0           | 0                               | 30 (0.044)                          |
| H18 (PAV)  | 0                    | 0                     | 0                                | 0           | 0                               | 0                                   |
| H19 (PAV)  | 0                    | 0                     | 0                                | 0           | 0                               | 0                                   |
| H20 (AAI)  | 0                    | 0                     | 0                                | 0           | 0                               | 0                                   |
| H21 (AVI)  | 0                    | 0                     | 0                                | 0           | 0                               | 0                                   |



(C)

|            |                     |                   | NON-AFRICANS           |                     |                       |                                        |
|------------|---------------------|-------------------|------------------------|---------------------|-----------------------|----------------------------------------|
| Haplotypes | Americas<br>(2N=26) | Europe<br>(2N=40) | Middle East<br>(2N=40) | Pakistan<br>(2N=16) | East Asia<br>(2N=142) | Total number of haplotypes<br>(2N=264) |
| H1 (AAI)   | 0                   | 1 (0.025)         | 2 (0.05)               | 0                   | 0                     | 3 (0.011)                              |
| H2 (AAV)   | 0                   | 0                 | 0                      | 0                   | 0                     | 0                                      |
| H3 (AAI)   | 0                   | 0                 | 0                      | 0                   | 0                     | 0                                      |
| H4 (AVI)   | 4 (0.154)           | 28 (0.70)         | 18 (0.45)              | 8 (0.5)             | 53 (0.373)            | 111 (0.420)                            |
| H5 (AVI)   | 0                   | 0                 | 0                      | 0                   | 0                     | 0                                      |
| H6 (AVI)   | 0                   | 0                 | 0                      | 1 (0.0625)          | 0                     | 1 (0.004)                              |
| H7 (AVI)   | 0                   | 0                 | 0                      | 0                   | 0                     | 0                                      |
| H8 (AVI)   | 0                   | 0                 | 0                      | 0                   | 0                     | 0                                      |
| H9 (AAI)   | 0                   | 0                 | 0                      | 0                   | 0                     | 0                                      |
| H10 (AAI)  | 0                   | 0                 | 0                      | 0                   | 0                     | 0                                      |
| H11 (AAI)  | 0                   | 0                 | 0                      | 0                   | 0                     | 0                                      |
| H12 (AAI)  | 0                   | 0                 | 0                      | 0                   | 0                     | 0                                      |
| H13 (AVI)  | 0                   | 0                 | 0                      | 0                   | 0                     | 0                                      |
| H14 (PAV)  | 19 (0.731)          | 11 (0.275)        | 20 (0.50)              | 7 (0.4375)          | 81 (0.570)            | 138 (0.523)                            |
| H15 (PAV)  | 0                   | 0                 | 0                      | 0                   | 0                     | 0                                      |
| H16 (PAV)  | 0                   | 0                 | 0                      | 0                   | 0                     | 0                                      |
| H17 (PAV)  | 0                   | 0                 | 0                      | 0                   | 0                     | 0                                      |
| H18 (PAV)  | 3 (0.115)           | 0                 | 0                      | 0                   | 8 (0.056)             | 11 (0.042)                             |
| H19 (PAV)  | 0                   | 0                 | 0                      | 0                   | 0                     | 0                                      |
| H20 (AAI)  | 0                   | 0                 | 0                      | 0                   | 0                     | 0                                      |
| H21 (AVI)  | 0                   | 0                 | 0                      | 0                   | 0                     | 0                                      |

**Table S6.** PTC haplotype counts in diverse populations from West Central Africa (Cameroon)(A), East Africa (Kenya and Tanzania) and non-Africans (C). The number of occurrences of each haplotype and corresponding frequencies in parentheses are given for Afroasiatic-, Nilo-Saharan-, Niger-Kordofanian-, Luo Nilo-Saharan- , Khoesan- speaking and non-African populations. Total haplotype counts and corresponding frequencies in parentheses are summarized in the last column of Table 4. Shaded rows indicate the common haplotypes associated with PTC sensitivity.

| Regression Statistics    | Raw Data | Significance (ANOVA) | Sex and Age Adjusted Data | Significance (ANOVA) |
|--------------------------|----------|----------------------|---------------------------|----------------------|
| <b>R squared</b>         | 0.355    | <b>p &lt; 0.001</b>  | 0.339                     | <b>p &lt; 0.001</b>  |
| <b>Adjusted R square</b> | 0.353    |                      | 0.338                     |                      |
| <b>Standard Error</b>    | 1.973    |                      | 2.049                     |                      |
| <b>Observations</b>      | 463      |                      | 463                       |                      |

**Table S7.** Linear Regression Statistics for both raw PTC data and age-sex corrected PTC data. An ANOVA was performed to test the significance of the fit of the regression model to the data for 463 African individuals. Significant p-values for both regression analyses using the raw PTC data and the age/sex corrected PTC data are shown here in bold.

(A)

**Descriptive Statistics**

|               | N   | Mean | Std. Deviation | Minimum | Maximum |
|---------------|-----|------|----------------|---------|---------|
| PTC_Phenotype | 463 | 8.21 | 2.420          | 1       | 13      |
| GENOTYPE      | 463 | 3.85 | 2.717          | 1       | 10      |

**Test Statistics<sup>b,c</sup>**

|                  |                         |             | PTC_<br>Phenotype |
|------------------|-------------------------|-------------|-------------------|
| Chi-Square       |                         |             | 163.266           |
| df               |                         |             | 8                 |
| Asymp. Sig.      |                         |             | .000              |
| Monte Carlo Sig. |                         |             | .000 <sup>a</sup> |
| Sig.             | 99% Confidence Interval | Lower Bound | .000              |
|                  |                         | Upper Bound | .000              |

a. Based on 10000 sampled tables with starting seed 2000000.

b. Kruskal Wallis Test

c. Grouping Variable: GENOTYPE

(B)

**Descriptive Statistics**

|                            | N   | Mean   | Std. Deviation | Minimum | Maximum |
|----------------------------|-----|--------|----------------|---------|---------|
| Corrected_ Phenotype_Score | 463 | 7.9589 | 2.51818        | -.23    | 13.65   |
| GENOTYPE                   | 463 | 3.85   | 2.717          | 1       | 10      |

**Test Statistics<sup>b,c</sup>**

|                  |                         |             | Corrected_ Phenotype_Score |
|------------------|-------------------------|-------------|----------------------------|
| Chi-Square       |                         |             | 138.577                    |
| df               |                         |             | 8                          |
| Asymp. Sig.      |                         |             | .000                       |
| Monte Carlo Sig. |                         |             | .000 <sup>a</sup>          |
|                  | 99% Confidence Interval | Lower Bound | .000                       |
|                  |                         | Upper Bound | .000                       |

a. Based on 10000 sampled tables with starting seed 299883525.

b. Kruskal Wallis Test

c. Grouping Variable: GENOTYPE

**Table S8.** Kruskal Wallis non-parametric test for genotype/phenotype association. Association between genotype and phenotype was also assessed using the nonparametric Kruskal Wallis test in SPSS. In this analysis, raw PTC scores (A) were entered as the Test Variable and genotypes were entered as the grouping variable. Similarly, PTC scores adjusted by age and sex (B) were entered in a separate analysis as the Test Variable, while genotypes were entered as the grouping variable. Significant p-values ( $p < 0.001$ ) are indicated by the superscript a.

| Model | R     | R square | Adjusted R square | Standard Error of the Estimate |
|-------|-------|----------|-------------------|--------------------------------|
| 1     | 0.587 | 0.345    | 0.342             | 1.963                          |

| Model      | Sum of Squares | df  | Mean Square | F      | Significance |
|------------|----------------|-----|-------------|--------|--------------|
| Regression | 932.626        | 2   | 466.313     | 120.97 | 0.000        |
| Residual   | 1773.206       | 461 | 3.855       |        |              |
| Total      | 2705.832       | 463 |             |        |              |

|       |                  | Unstandardized Coefficients |                | Standardized Coefficients |        |              |
|-------|------------------|-----------------------------|----------------|---------------------------|--------|--------------|
| Model |                  | B                           | Standard Error | Beta                      | t      | Significance |
| 1     | (Constant)       | 7.423                       | 0.138          |                           | 53.593 | 0.000**      |
|       | Additive Effect  | 2.089                       | 0.138          | 0.576                     | 15.085 | 0.000**      |
|       | Dominance Effect | 1.105                       | 0.185          | 0.227                     | 5.961  | 0.000**      |

**Table S9.** Analysis of PAV Dominance. The PTC scores adjusted by age and sex were entered into the regression model as the dependent variable. The recoded additive and dominance coefficients were entered as independent variables. Significant p-values ( $p < 0.001$ ) are indicated by \*\*.

| Feature Key        | Positions | Length (number of amino acids) | Description   | Number of nonsynonymous variants | Nucleotide Position (Amino Acid Position)  |
|--------------------|-----------|--------------------------------|---------------|----------------------------------|--------------------------------------------|
| Topological domain | 1-17      | 17                             | Extracellular | 2                                | 17(6);23(8)                                |
| Transmembrane      | 18-38     | 21                             | TM1           | 1                                | 106(36)                                    |
| Topological domain | 39-55     | 17                             | Cytoplasmic   | 1                                | 145(49)*                                   |
| Transmembrane      | 56-76     | 21                             | TM2           | 1                                | <b>191(64)</b>                             |
| Topological domain | 77-94     | 18                             | Extracellular | 1                                | <b>239(80)</b>                             |
| Transmembrane      | 95-115    | 21                             | TM3           | 0                                |                                            |
| Topological domain | 116-142   | 27                             | Cytoplasmic   | 4                                | <b>362(121);369(123);403(135);416(139)</b> |
| Transmembrane      | 143-163   | 21                             | TM4           | 0                                |                                            |
| Topological domain | 164-190   | 27                             | Extracellular | 0                                | 569(190)                                   |
| Transmembrane      | 191-211   | 21                             | TM5           | 0                                |                                            |
| Topological domain | 212-251   | 40                             | Cytoplasmic   | 2                                | 649(217);704(235)                          |
| Transmembrane      | 252-272   | 21                             | TM6           | 3                                | 785(262)*;802(268);809(270)                |
| Topological domain | 273-276   | 4                              | Extracellular | 2                                | 820(274);823(275)                          |
| Transmembrane      | 277-297   | 21                             | TM7           | 1                                | 886(296)*                                  |
| Topological domain | 298-333   | 36                             | Cytoplasmic   | 1                                | 932(311)                                   |

**Table S10** The distribution of nonsynonymous SNP variation within the protein structure of the *TAS2R38* receptor. *TAS2R38* encodes a transmembrane (TM) protein that recognizes bitter tasting ligands outside the cell (Extracellular) and activates signal transduction inside the cell (Cytoplasmic). This table indicates the amino acid domains of the *TAS2R38* receptor protein in relation to inner and outer surfaces of the cell membrane. The number of identified nonsynonymous variation together with their nucleotide position and amino acid position (in parentheses) are given. The positions with asterisks indicate the common variants associated with PTC

sensitivity, and the numbers in bold are the novel rare amino acid variants that were shown to modify PTC sensitivity based on statistical analyses and the Polyphen-2 software (Ramensky, Bork, and Sunyaev 2002).



| Mutation # | Age of Mutation (TMRCA in years) | Standard Deviation of TMRCA |
|------------|----------------------------------|-----------------------------|
| 1          | 9,187                            | 20,403                      |
| 2          | 26,010                           | 43,908                      |
| 3          | 28,397                           | 25,533                      |
| 4 (49)     | <b>1,312,476</b>                 | <b>242,211</b>              |
| 5          | 11,931                           | 23,266                      |
| 6          | 26,726                           | 47,726                      |
| 7          | 73,140                           | 99,509                      |
| 8          | 25,652                           | 54,169                      |
| 9          | 49,158                           | 65,385                      |
| 10         | 5,918                            | 17,181                      |
| 11         | 14,675                           | 21,715                      |
| 12 (262)   | <b>336,471</b>                   | <b>89,845</b>               |
| 13         | 4,689                            | 16,584                      |
| 14         | 52,254                           | 6,5623.8                    |
| 15 (296)   | <b>1,035,663</b>                 | <b>267,268</b>              |

**Table S11.** Inferred ages of mutations in the *TAS2R38* coding region for global populations. The mutations with numbers in parentheses are the amino acid positions of the common variants associated with PTC sensitivity. Mutation numbers in Table correspond to the mutation numbers (in small print) on the gene tree in Figure 4.

| Sample                                               | Fixed | Polymorphic | Fisher's Exact Test |
|------------------------------------------------------|-------|-------------|---------------------|
| <b>West Central Africa (Cameroon)<br/>(2N=542)</b>   |       |             |                     |
| Synonymous                                           | 3     | 2           |                     |
| Nonsynonymous                                        | 3     | 18          | p = 0.062 #         |
| <b>East Africa (Kenya and Tanzania)<br/>(2N=680)</b> |       |             |                     |
| Synonymous                                           | 3     | 1           |                     |
| Nonsynonymous                                        | 3     | 18          | p = 0.031 *         |
| <b>All Africans (2N=1222)</b>                        |       |             |                     |
| Synonymous                                           | 3     | 2           |                     |
| Nonsynonymous                                        | 3     | 22          | p = 0.041 *         |
| <b>Non-Africans (2N=264)</b>                         |       |             |                     |
| Synonymous                                           | 3     | 1           |                     |
| Nonsynonymous                                        | 3     | 8           | p = 0.560           |

**Table S12.** McDonald-Kreitman test of neutrality for the coding region. The 2 X 2 contingency table contains the number of synonymous and nonsynonymous polymorphisms within a species, and the number of synonymous and nonsynonymous changes that are fixed between species. Significance was determined using Fisher's Exact Test. Statistically significant ( $P < 0.05$ ) p-values are indicated by \*, while marginally significant ( $0.05 < p < 0.1$ ) p-values are indicated by #

| <b>Sample</b>   | <b>Observed Statistic</b> |          | <b>Population Growth Scenarios</b> |                |                |                |          |                |
|-----------------|---------------------------|----------|------------------------------------|----------------|----------------|----------------|----------|----------------|
|                 | <b>Tajima's D</b>         | <b>A</b> | <b>B</b>                           | <b>C</b>       | <b>D</b>       | <b>E</b>       | <b>F</b> | <b>G</b>       |
| Pooled Africans | -0.8024                   | 0.232    | 0.147                              | <b>0.014 *</b> | <b>0.027 *</b> | <b>0.016 *</b> | NA       | NA             |
| Non-Africans    | 1.7114                    | NA       | NA                                 | NA             | NA             | NA             | 0.064    | <b>0.014 *</b> |

**Table S13.** Observed Tajima's D statistic for the coding region of *TAS2R38* and corresponding p-values for different scenarios of population growth. Using the ms program (Hudson 1990), seven demographic scenarios were simulated: the first five scenarios (A-D) are specific to African populations and the last two scenarios (E-G) are specific to non-African populations: (A) represents a 10-fold increase in population size in Africans (from an initial population size of 10,000 individuals) starting at 70 kya until the present (B) represents a 15-fold increase in population size of Africans (from an initial population size of 10,000 individuals) starting at 70 kya until the present (C) represents a 20-fold increase in population size of Africans (from an initial population size of 10,000 individuals) starting at 70 kya until the present, (D) represents a 40-fold increase in population size (from an initial population size of 10,000 individuals) starting at 70 kya until the present, and (E), (F) and (G), respectively, represent a population bottleneck (from an initial population size of 10,000 individuals and decreasing to 3,000 individuals) at 60,000 years ago, corresponding to the time modern humans migrated out of Africa, followed by a 10-fold (E), 20-fold (F) and 40-fold (G) increase in population size starting at 50 kya until the present. A p-value of 0.025 or less indicates that the observed statistic is significantly greater than expected consistent with a scenario of balancing selection and is denoted by \*

## **Supplemental References**

**Ethnologue Languages of the world, <http://www.ethnologue.com/>.**

**Fedders, A., and C. Salvadori. 1998. Peoples and Cultures of Kenya. Transafrica, Nairobi.**

**Hudson, R. R. 1990. Gene Genealogies and the Coalescent Process. Oxford University Press, Oxford.**

**Ramensky, V., P. Bork, and S. Sunyaev. 2002. Human non-synonymous SNPs: server and survey. Nucleic Acids Res 30:3894-3900.**

**Tishkoff, S. A., F. A. Reed, F. R. Friedlaender, C. Ehret, A. Ranciaro, A. Froment, J. B. Hirbo, A. A. Awomoyi, J. M. Bodo, O. Doumbo, M. Ibrahim, A. T. Juma, M. J. Kotze, G. Lema, J. H. Moore, H. Mortensen, T. B. Nyambo, S. A. Omar, K. Powell, G. S. Pretorius, M. W. Smith, M. A. Thera, C. Wambebe, J. L. Weber, and S. M. Williams. 2009. The genetic structure and history of Africans and African Americans. Science 324:1035-1044.**
